# Supplementary material
Source: bioRxiv or medRxiv preprint supplement (https://www.biorxiv.org/highwire/filestream/124233/field_highwire_adjunct_files/0/275156-1.pdf)

## Supplementary Tables

**Supplementary Table 1:** List of genes that are profiled by the seqFISH experiment.

|               |         |         |           |         |
|---------------|---------|---------|-----------|---------|
| 4931431F19Rik | Ctla4   | Hnf1a   | Obsl1     | Cpne5   |
| 4932429P05Rik | Cyp2c70 | Hoxb3   | Olr1      | Nes     |
| Abca15        | Cyp2j5  | Hoxb8   | Osr2      | Acta2   |
| Abca9         | Dbx1    | Hyal5   | Plid1     | Gja1    |
| Adcy4         | Dcstamp | Kif16b  | Plid5     | Omg     |
| Aldh3b2       | Ddb2    | Laptm5  | Poln      | Nov     |
| Ankle1        | Egln3   | Lefty2  | Ppp1r3b   | Col5a1  |
| Ano7          | Fam69c  | Lhx3    | Psmd5     | Dcx     |
| Anxa9         | Fbll1   | Lhx4    | Rbm31y    | Itpr2   |
| Arhgef26      | Foxa1   | Lmod1   | Rrm2      | Rhob    |
| B3gat2        | Foxa2   | Mertk   | Scml2     | Sox2    |
| Barhl1        | Foxd1   | Mgam    | Senp1     | Cldn5   |
| Bcl2l14       | Foxd4   | Mmgt1   | Serpinb11 | Mrc1    |
| Blzf1         | Galnt3  | Mmp8    | Sis       | Tbr1    |
| Bmpr1b        | Gata6   | Mrgprb1 | Slc4a8    | Pax6    |
| Capn13        | Gdf2    | Murc    | Slc6a16   | Calb1   |
| Cdc5l         | Gdf5    | Nell1   | Spag6     | Gda     |
| Cdc6          | Gm15688 | Neurod4 | Sumf2     | Slc5a7  |
| Cdh1          | Gm6377  | Neurog1 | Tnfrsf1b  | Sema3e  |
| Cecr2         | Gm805   | Nfkb2   | Vmn1r65   | Mfge8   |
| Cilp          | Gpc4    | Nfkbiz  | Vps13c    | Lyve1   |
| Clec5a        | Gpr114  | Nhlh1   | Wrn       | Loxl1   |
| Creb1         | Gykl1   | Nkd2    | Zfp182    | Slco1c1 |
| Creb3l1       | Hdx     | Nlrp12  | Zfp715    | Amigo2  |

|         |      |       |       |        |
|---------|------|-------|-------|--------|
| Csf2rb2 | Hn1l | Npy2r | Zfp90 | Kcnip2 |
|---------|------|-------|-------|--------|

**Supplementary Table 2:** List of 43 genes used for cell type mapping.

|          |        |         |          |      |
|----------|--------|---------|----------|------|
| Fbll1    | Itpr2  | Vps13c  | Tnfrsf1b | Sox2 |
| Hdx      | Wrn    | Sumf2   | Vmn1r65  | Rhob |
| Mrgprb1  | Calb1  | Pld1    | Laptm5   | Tbr1 |
| Slc5a7   | Abca9  | Ankle1  | Olr1     |      |
| Cecr2    | Cpne5  | Blzf1   | Mertk    |      |
| Nell1    | Npy2r  | Cdc5l   | Slco1c1  |      |
| Pax6     | Cldn5  | Cyp2j5  | Mfge8    |      |
| Col5a1   | Bmpr1b | Rrm2    | Gja1     |      |
| Dcx      | Spag6  | Csf2rb2 | Gda      |      |
| Arhgef26 | Slc4a8 | Gm805   | Omg      |      |

**Supplementary Table 3:** Astrocyte prediction accuracy, evaluated using fluorescent staining images. We examined and contrasted DAPI, Nissl staining on astrocyte cells. Percentage of cells with no Nissl, and with DAPI staining are recorded (these are accurate instances)

|                 | % predicted astrocytes with weak or no Nissl stain | % predicted astrocytes with present Nissl stain | Total predicted astrocytes |
|-----------------|----------------------------------------------------|-------------------------------------------------|----------------------------|
| Cortex Column 1 | 100%                                               | 0%                                              | 11                         |
| Cortex Column 2 | 88%                                                | 12%                                             | 25                         |
| Cortex Column 3 | 87%                                                | 13%                                             | 24                         |
| Cortex Column 4 | 87%                                                | 13%                                             | 24                         |

**Supplementary Table 4:** List of 69 genes used for HMRF.

|        |        |         |         |          |
|--------|--------|---------|---------|----------|
| Calb1  | Gdf5   | Rbm31y  | Zfp182  | Pld5     |
| Kcnip2 | Nkd2   | Creb3l1 | Gpc4    | Gm805    |
| Tbr1   | Fam69c | Nfkbiz  | Obsl1   | Clec5a   |
| Nes    | Sema3e | Hoxb8   | Dcstamp | Serpnb11 |
| Gda    | Dcx    | Adcy4   | Poln    | Zfp715   |

|        |         |         |               |        |
|--------|---------|---------|---------------|--------|
| Col5a1 | Lhx3    | Mmgt1   | Cdh1          | Blzf1  |
| Loxl1  | Omg     | Lhx4    | Ppp1r3b       | Bm6377 |
| Sox2   | Wrn     | Lefty2  | Mgam          | Zfp90  |
| Slc5a7 | Aldh3b2 | Gm15688 | Hn1l          |        |
| Nov    | Foxd1   | Kif16b  | Hdx           |        |
| Cpne5  | Cyp2c70 | Vmn1r65 | Psm5          |        |
| Mrc1   | Hnf1a   | Foxa2   | Bcl2l14       |        |
| Acta2  | Slc4a8  | Gpr114  | Osr2          |        |
| Cyp2j5 | Barhl1  | Gata6   | 4931431F19Rik |        |
| Lyve1  | Egln3   | Nhlh1   | Lmod1         |        |

**Supplementary Table 5:** Expanded domain specific signatures used for Tasic et al reanalysis

|     |                                                                 |
|-----|-----------------------------------------------------------------|
| O1  | gata6 aldh3b2 kcnips gm805 b3gat2 amigo2 cdc6                   |
| O2  | serpinb11 fam69c capn13 ankle1 mmp8 cecr2 foxd4 barhl1          |
| O3  | lmod1 mmgt1 lefty2 hn1l foxd1 pld1 olr1                         |
| O4  | lhx3 omg arhgef26                                               |
| IS  | adcy4 nkd2 cyp2j5 dbx1 zfp715 mgam senp1 hnf1a ddb2 nfkb2 blzf1 |
| I2  | hn1l cdc5l murc nhlh1 creb1                                     |
| I3  | gata6 vmn1r65 sema3e foxa1 obsl1                                |
| I1a | loxl1 clec5a cpne5 creb3l1 gpc4 calb1 sox2 nes vps13c           |
| I1b | mrc1 nkd2 sema3e col5a1 dcx slc5a7 nov rhob pax6                |

## Supplementary Figures

**Supplementary Fig 1:** Quantile-quantile plot per gene for each of 113 genes shared between seqFISH and scRNAseq dataset. Q-Q plot shows the comparison of quantiles between scRNAseq (y-axis) and seqFISH (x-axis). Quantiles refer to expression z-score quantiles after each scRNAseq and seqFISH dataset has been transformed by row- and column-wise z-scoring.

**Supplementary Fig 2:** Robustness analysis of domain identifications by HMRF model with respect to cell-type marker filtering. (a) different scenarios. “ct” denotes “cell-type”. “Plus.11.ct.genes” denotes unfiltered scenario which added all 11 ct genes. (b, c) Agreement between domain assignment using different cell-type filtering settings quantified by (b) overall clustering consistency and (c) contingency table. (d) spatial patterns found by HMRF in each scenario, in comparison with 69-gene HMRF.

**Supplementary Fig 3:** Comparison between the (a) spatial domain annotation and (b) major cell type annotation. tSNE constructed from the 69 genes used in HMRF and shows the seqFISH dataset.

**Supplementary Fig 4:** Enrichment of cell types in spatial domains. Enrichment is calculated as  $(\text{num. cells}) / \sqrt{(\text{colsum} \times \text{rowsum})}$ , where number of cells refers to cells that overlap between a domain and a cell type. Col- and row-sums refer to the overlap table.

**Supplementary Fig 5:** Spatial expression of domain marker genes. Representative genes of the 9 domains include Barhl1 (O2), Nfkb2 (IS), Col5a1 (I1a), Aldh3b2 (O1), Calb1 (I1b), Omg (O4), Nhlh1 (I2), Gata6 (I3), and Plid1 (O3). Black outlines around some cells highlight the domain annotations.

**Supplementary Fig 6:** General domain signatures transcend cell types. For cells annotated to each cell type : spatial domain pair; only those containing at least 4 cells are represented. Top row: domain type; 2nd row: cell type. The heatmap below shows the average level of domain associated genes.

**Supplementary Fig 7:** Distribution of expression levels representative of domain- and cell-type specific marker genes. (a) Representative domain-specific marker genes. The corresponding domains are indicated in parentheses in title. (b) Representative cell-type specific marker genes. The corresponding cell types are indicated in parentheses in title. Each box represents the distribution associated with the intersection of a specific cell type and spatial domain pair. Only pairs which contain >5 cells are analyzed. Groups ordered by domain.

**Supplementary Fig 8:** Comparison of domain specific genes with Allen Brain Atlas. Genes compared are: Calb1, Sema3e, Gda, Nell1, Tbr1, Cpne5, Gdf5, Nov, Aldh3b2, Nkd2, Serpinb11. For each gene, the top right image shows the Allen Brain Atlas ISH staining. Bottom

right shows the z-scored expression in microdissection cell clusters from Zeisel et al and Tasic et al scRNAseq datasets. SeqFISH profiles agree well with existing resources.

**Supplementary Fig 9:** Metagene expression levels. (a) 9 metagenes each marking a different spatial domain. (b) the spatial domain annotations.

**Supplementary Fig 10:** Applications of domain metagene signatures on mapping the domain patterns of glutamatergic cells. Shown are glutamatergic cells only. Red indicates metagene expression.

**Supplementary Fig 11:** A zoomed-in view of comparison between spatial domain annotations (left) and metagene expression levels (right) at domain boundaries indicated in Fig 3b.

**Supplementary Fig 12:** Comparison of morphological features across different spatial domains. 6 of the 15 morphological features extracted from Nissl staining images are significantly different across domains. Significance is judged by both of the following criteria, whereby 1) each domain is compared to an individual domain and is  $P < 0.05$  in at least 7 of 8 one-vs-one K-S tests, and 2) each domain is compared to all cells in remaining domains ( $P < 0.00001$ , one-vs-rest test). (a) The distribution of the 6 significant features across domains. (b) The P-values obtained from the one-vs-rest tests.

**Supplementary Fig 13:** ISH validation of additional spatial domain markers identified from integrative analysis. Source: Allen Brain Atlas.

**Supplementary Fig 14:** Overlap between spatial domain and glutamatergic subtype annotations for the the Tasic et al dataset. (a) Overlap between domain- and cell subtype-specific genes focused within the 125-gene fraction. (b) Overlap between cells annotated as a specific domain vs subtype.

**Supplementary Fig 15:** Complete cell subtype annotations overlaid on tSNE of Tasic et al glutamatergic cells based on metagene expression.

**Supplementary Fig 16:** Comparison of metagene-recovered spatial populations with cell subtypes in Tasic et al dataset. (a) Overlay of expression patterns of representative cell subtype markers (*col5a1*, *cpne5*, *sema3e*, *serpinb11*) on t-SNE plot that was generated in the same way as Fig 4a (obtained from metagene signatures). Red demarcates cells expressing the gene. It can be seen that these genes served as markers of both cell subtypes and domains. (b) Some distinct populations recovered by metagenes do not correspond to any specific cell subtypes identified by Tasic et al. Shown are three examples (O1, I2, and O4). The second row shows the subtype annotations.

**Supplementary Fig 17:** Expression of astrocyte-associated domain genes in an external astrocyte expression database (Zhang et al 2016). Low-level expression is defined as  $< 10$  FPKM. High level is between 10 and 160 FPKM.

**Supplementary Fig 18:** Spatial organization of the mouse olfactory bulb as revealed by the HMRF model. (a) This spatial transcriptome dataset was generated by Stahl et al 2016. and obtained by using tissue microarray to barcode spatial locations at a 100um resolution followed by RNA sequencing. (b) Spatial domains identified by using a 5-state HMRF model. (c) Expression patterns of representative marker genes. (d) The anatomic structure identified by hematoxylin and eosin staining.

**Supplementary Fig 19:** Spatial organization of the mouse dentate gyrus as revealed by the HMRF model. This is a 249-gene seqFISH dataset (Shah et al 2016) with single-cell spatial and transcriptomic information. (a) Spatial domains identified by the 5-state HMRF model. (b) Schematic of the anatomic structure at dentate gyrus. Rectangular boxes indicate the imaging fields shown in (a). (c) The expression pattern of a number of representative marker genes.

Methods:

**Supplementary Fig 20:** Estimates of imaging bias in the seqFISH data. Cortex is divided into 20 adjacent fields of view (shortened as fields). We divide each field into a 50 bin-by-50 bin grid. Then for each bin, we compute the average expression level at that bin over all 20 fields. Together this forms an overall bias map. Principal component analysis was applied to the bias map to model the most significant bias patterns among genes. The top PCs are shown below representing the major bias patterns.

**Supplementary Fig 21:** Dependency of cell-type mapping accuracy on the number of genes used. (a) Relationship between the 8 major, 22 finer, and 49 minor cell types determined by Tasic et al. (b,c,d) Cross-validation estimated mapping accuracy associated with (b) 8 major, (c) 22 finer, and (d) 49 minor classes.

**Supplementary Fig 22:** Cross-validation estimated mapping accuracy for individual cell types. (a) Receiver operating curves (ROC) for each of the eight major cell types. (b) Cross validation accuracies of individual cell types.

**Supplementary Fig 23:** Robustness analysis of our HMRF model. Agreement between domain assignment using different numbers of top spatially coherent genes. Agreement is quantified by (a) contingency table and (b) adjusted mutual information (left) and the proportion of cells clustered consistently (i.e. the diagonal of matrix in (a)) (right).

**Supplementary Fig 24:** Robustness analysis of beta in our HMRF model. Agreement between domain assignment using different betas. Agreement is quantified in (a) by the adjusted mutual information (left) and the proportion of cells clustered consistently (right) (i.e. the diagonal of matrix in (b)). (b) Overlap matrix in each case. (c) Spatial pattern comparison.

**Supplementary Fig 25:** Robustness analysis of the HMRF model against disruption of spatial patterns. A subset of cells at various fractions ( $p=0.1, 0.2, 0.4, \text{ and } 0.99$ ) were randomly selected and switched spatial locations. 100 different random samples were selected for each

parameter setting. For each perturbed dataset, the HMRF model was applied to identify spatial domains. Goodness-of-fit was quantified by using the log-likelihood. Blue vertical line indicates the log-likelihood for the original data set.

**Supplementary Fig 26:** SeqFISH expression z-scores approximately follow a normal distribution.

**Supplementary Fig 27:** Domain signatures obtained by non-parametric Mann-Whitney U test. (a) general domain signature, complementary to Fig 2d. (b) glutamatergic restricted signature, complementary to Fig 3b, middle panel.





# SFig 1

Expr. z-score  
 ↑  
 seqFISH  
 ↑  
 Expr. z-score

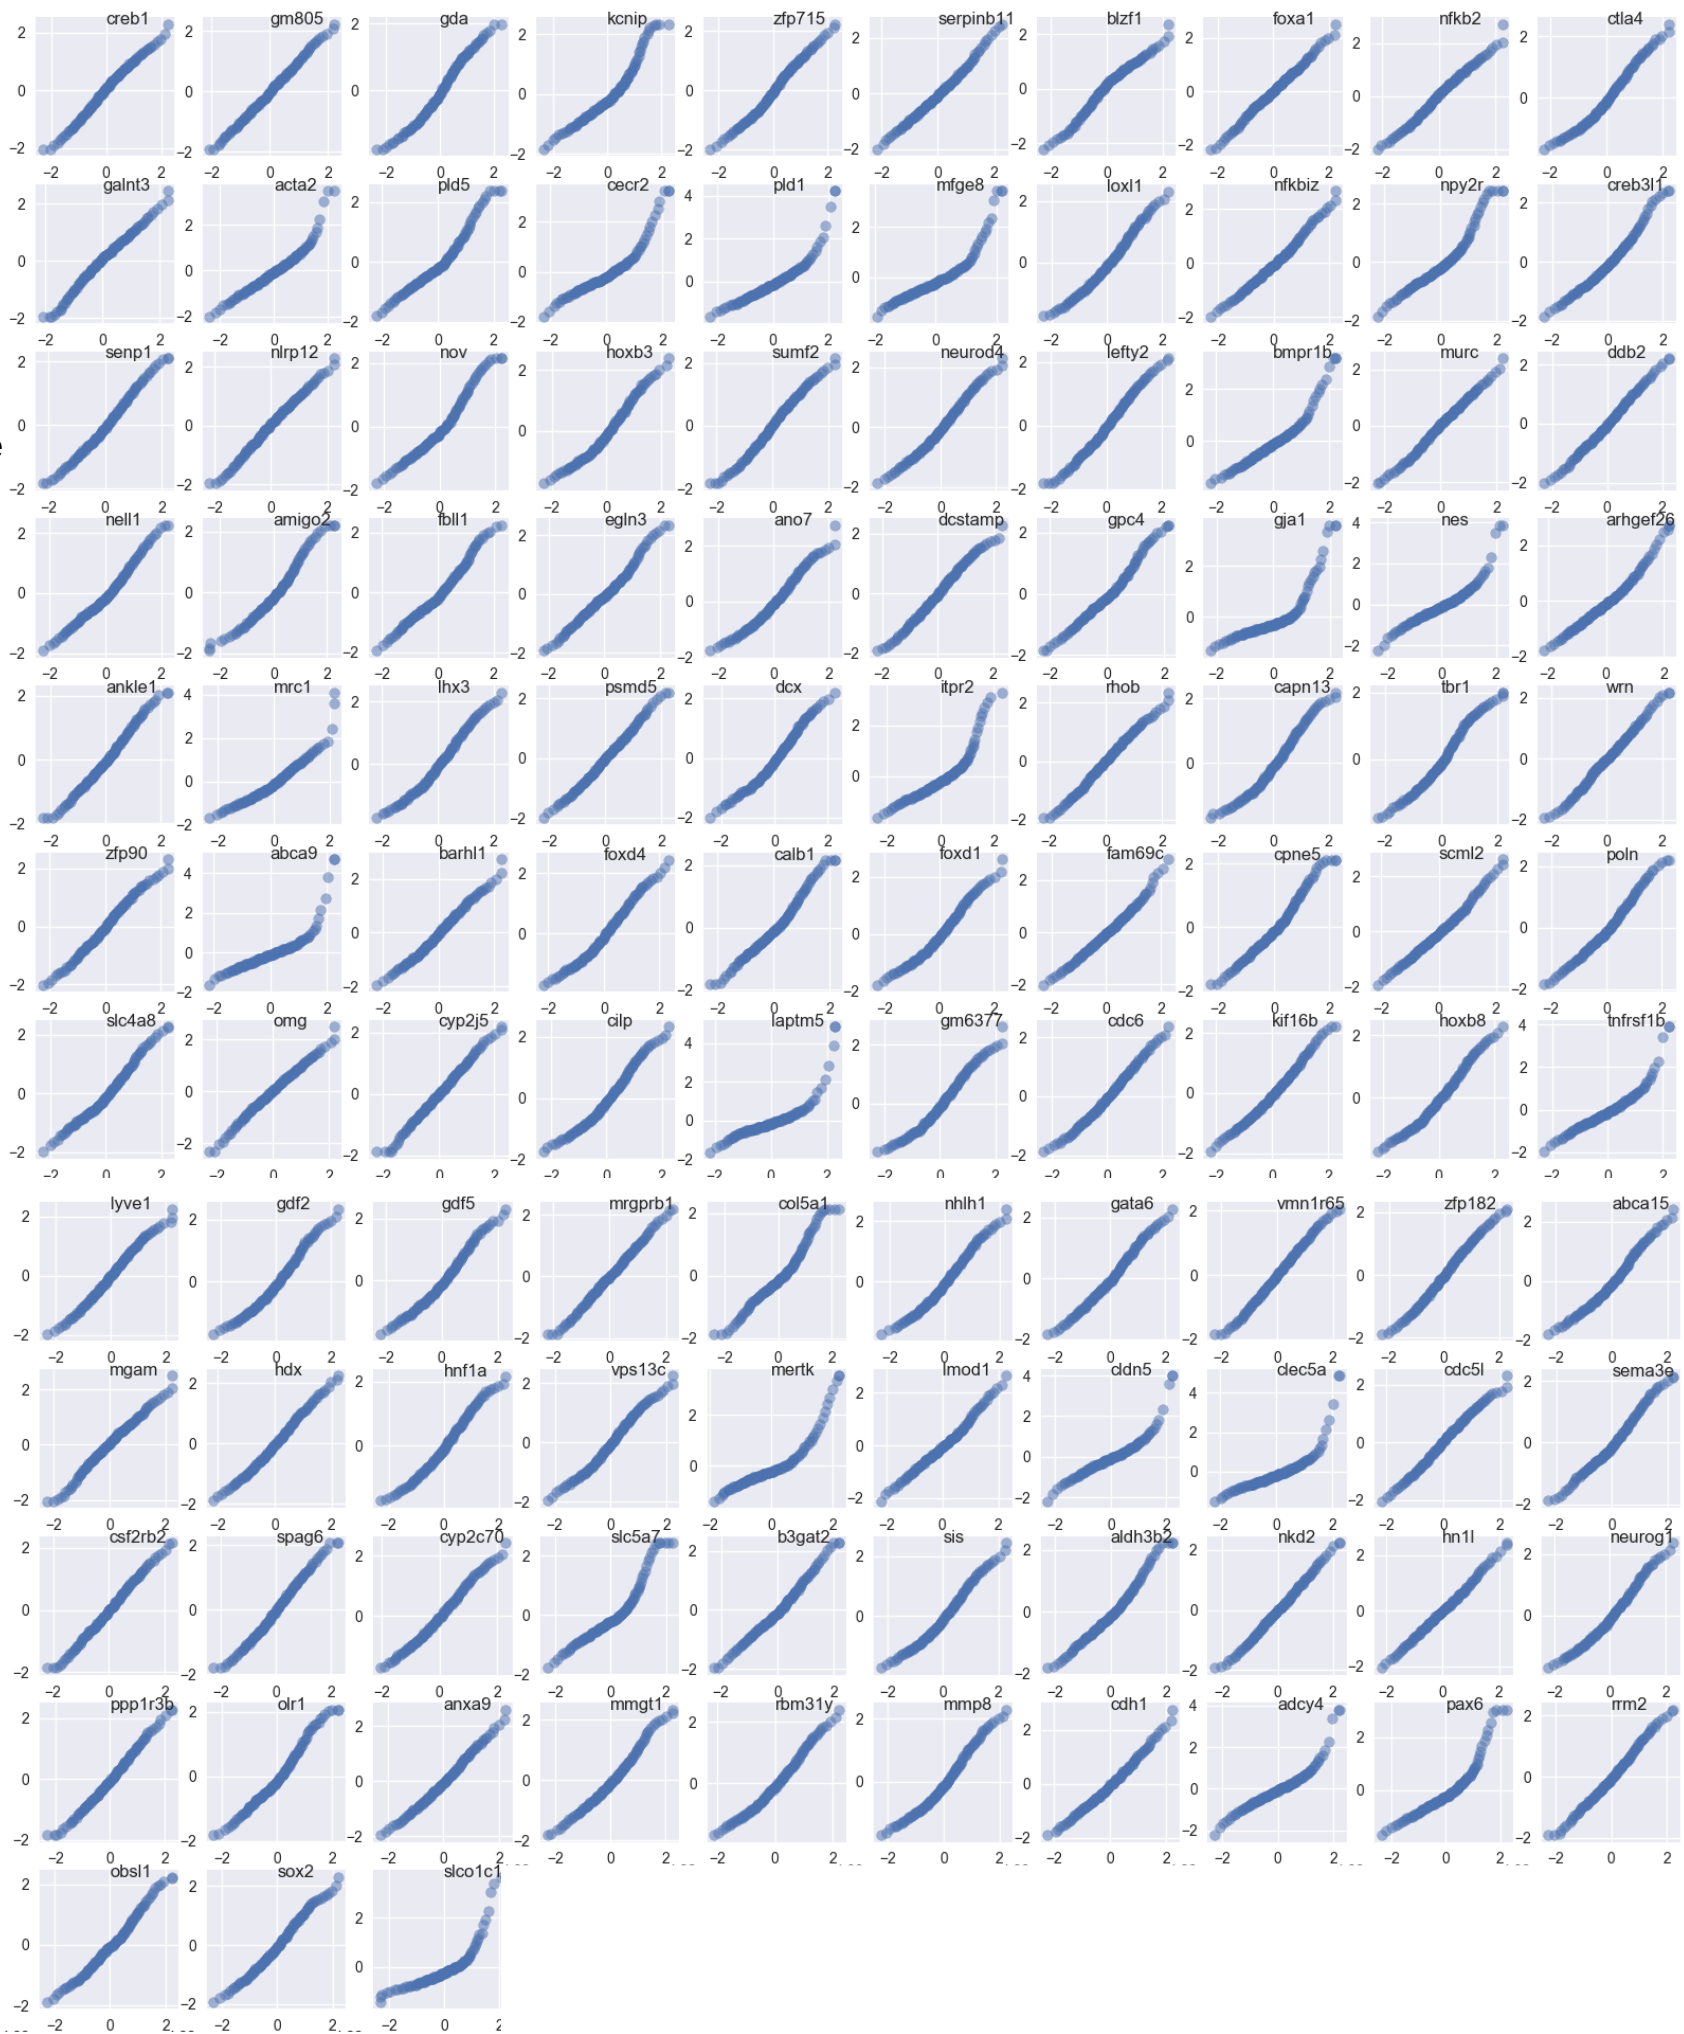

# SFig 2

a

**Baseline:**  
69-gene HMRF (already removed 11 cell type (ct) genes)

**Minus.5.ct.genes:**  
remove 5 additional ct genes (64-gene HMRF)

**Minus.3.ct.genes:**  
remove 3 additional ct genes (66-gene HMRF)

**Plus.5.ct.genes:**  
add back 5 ct genes (74-gene HMRF)

**Plus.11.ct.genes (unfiltered):**  
add back all 11 ct genes (80-gene HMRF)

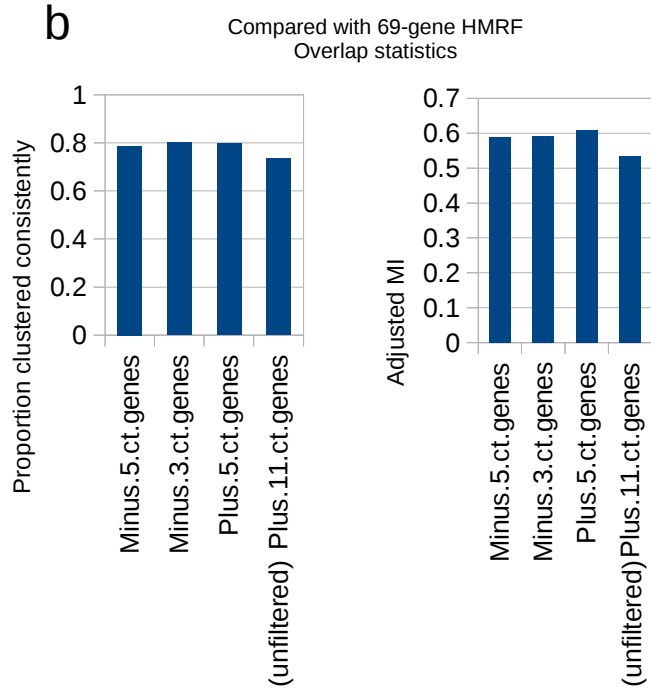

c

Compared with 69-gene HMRF  
Overlap matrices

|              |                                    | Minus.5.ct.genes HMRF |     |     |     |     |     |     |     |     |    |
|--------------|------------------------------------|-----------------------|-----|-----|-----|-----|-----|-----|-----|-----|----|
| 69-gene HMRF | 69-gene HMRF                       | 271                   | 5   | 3   | 0   | 0   | 0   | 0   | 20  | 0   | 20 |
|              | Minus.5.ct.genes HMRF              | 8                     | 83  | 1   | 0   | 0   | 0   | 0   | 9   | 0   | 7  |
|              | Minus.3.ct.genes HMRF              | 5                     | 0   | 8   | 113 | 23  | 9   | 0   | 1   | 0   | 0  |
|              | Plus.5.ct.genes HMRF               | 13                    | 1   | 13  | 3   | 130 | 6   | 0   | 0   | 0   | 0  |
|              | Plus.11.ct.genes HMRF (unfiltered) | 0                     | 0   | 3   | 1   | 5   | 67  | 0   | 0   | 0   | 0  |
|              | Baseline                           | 23                    | 7   | 0   | 0   | 0   | 0   | 0   | 124 | 1   | 2  |
|              | Minus.5.ct.genes                   | 23                    | 6   | 6   | 4   | 2   | 0   | 0   | 119 | 12  | 0  |
|              | Minus.3.ct.genes                   | 41                    | 6   | 12  | 0   | 1   | 0   | 12  | 14  | 233 | 0  |
|              | Plus.5.ct.genes                    | 81                    | 5   | 11  | 2   | 17  | 0   | 0   | 2   | 3   | 0  |
|              | Plus.11.ct.genes (unfiltered)      | 3                     | 233 | 45  | 7   | 1   | 1   | 0   | 15  | 5   | 0  |
| 69-gene HMRF | 69-gene HMRF                       | 2                     | 23  | 24  | 15  | 3   | 0   | 1   | 23  | 8   |    |
|              | Minus.5.ct.genes HMRF              | 8                     | 8   | 6   | 104 | 1   | 0   | 0   | 0   | 2   |    |
|              | Minus.3.ct.genes HMRF              | 15                    | 1   | 11  | 2   | 142 | 4   | 3   | 2   | 1   |    |
|              | Plus.5.ct.genes HMRF               | 2                     | 0   | 1   | 0   | 5   | 72  | 2   | 0   | 0   |    |
|              | Plus.11.ct.genes HMRF (unfiltered) | 9                     | 0   | 6   | 1   | 18  | 5   | 115 | 0   | 0   |    |
|              | Baseline                           | 0                     | 1   | 17  | 3   | 0   | 0   | 0   | 114 | 3   |    |
|              | Minus.5.ct.genes                   | 0                     | 7   | 10  | 1   | 0   | 0   | 0   | 9   | 89  | 0  |
|              | Minus.3.ct.genes                   | 86                    | 28  | 3   | 3   | 0   | 11  | 0   | 1   | 0   | 0  |
|              | Plus.5.ct.genes                    | 5                     | 144 | 5   | 5   | 0   | 4   | 0   | 0   | 1   | 0  |
|              | Plus.11.ct.genes (unfiltered)      | 0                     | 10  | 99  | 2   | 0   | 2   | 0   | 0   | 1   | 0  |
| 69-gene HMRF | 69-gene HMRF                       | 7                     | 62  | 17  | 2   | 0   | 0   | 10  | 1   | 3   | 2  |
|              | Minus.5.ct.genes HMRF              | 0                     | 0   | 0   | 0   | 73  | 0   | 1   | 5   | 1   | 0  |
|              | Minus.3.ct.genes HMRF              | 3                     | 13  | 1   | 3   | 0   | 130 | 1   | 0   | 0   | 0  |
|              | Plus.5.ct.genes HMRF               | 0                     | 1   | 0   | 3   | 7   | 1   | 171 | 12  | 26  | 0  |
|              | Plus.11.ct.genes HMRF (unfiltered) | 0                     | 3   | 1   | 7   | 2   | 0   | 4   | 100 | 3   | 0  |
|              | Baseline                           | 10                    | 17  | 9   | 28  | 0   | 7   | 9   | 0   | 86  | 0  |
|              | Minus.5.ct.genes                   | 74                    | 5   | 8   | 0   | 0   | 1   | 1   | 0   | 0   | 0  |
|              | Minus.3.ct.genes                   | 3                     | 99  | 16  | 0   | 1   | 3   | 4   | 0   | 3   | 0  |
|              | Plus.5.ct.genes                    | 5                     | 12  | 154 | 2   | 1   | 38  | 1   | 1   | 1   | 0  |
|              | Plus.11.ct.genes (unfiltered)      | 0                     | 0   | 0   | 113 | 15  | 0   | 5   | 5   | 1   | 0  |
| 69-gene HMRF | 69-gene HMRF                       | 0                     | 0   | 1   | 5   | 110 | 4   | 14  | 3   | 2   | 0  |
|              | Minus.5.ct.genes HMRF              | 0                     | 2   | 6   | 9   | 25  | 68  | 18  | 7   | 11  | 0  |
|              | Minus.3.ct.genes HMRF              | 0                     | 2   | 2   | 22  | 85  | 2   | 14  | 8   | 17  | 0  |
|              | Plus.5.ct.genes HMRF               | 0                     | 0   | 0   | 12  | 31  | 0   | 7   | 84  | 4   | 0  |
|              | Plus.11.ct.genes HMRF (unfiltered) | 0                     | 1   | 0   | 2   | 10  | 4   | 7   | 3   | 96  | 0  |
|              | Baseline                           | 0                     | 0   | 0   | 0   | 0   | 0   | 0   | 0   | 0   | 0  |
|              | Minus.5.ct.genes                   | 0                     | 0   | 0   | 0   | 0   | 0   | 0   | 0   | 0   | 0  |
|              | Minus.3.ct.genes                   | 0                     | 0   | 0   | 0   | 0   | 0   | 0   | 0   | 0   | 0  |
|              | Plus.5.ct.genes                    | 0                     | 0   | 0   | 0   | 0   | 0   | 0   | 0   | 0   | 0  |
|              | Plus.11.ct.genes (unfiltered)      | 0                     | 0   | 0   | 0   | 0   | 0   | 0   | 0   | 0   | 0  |

d

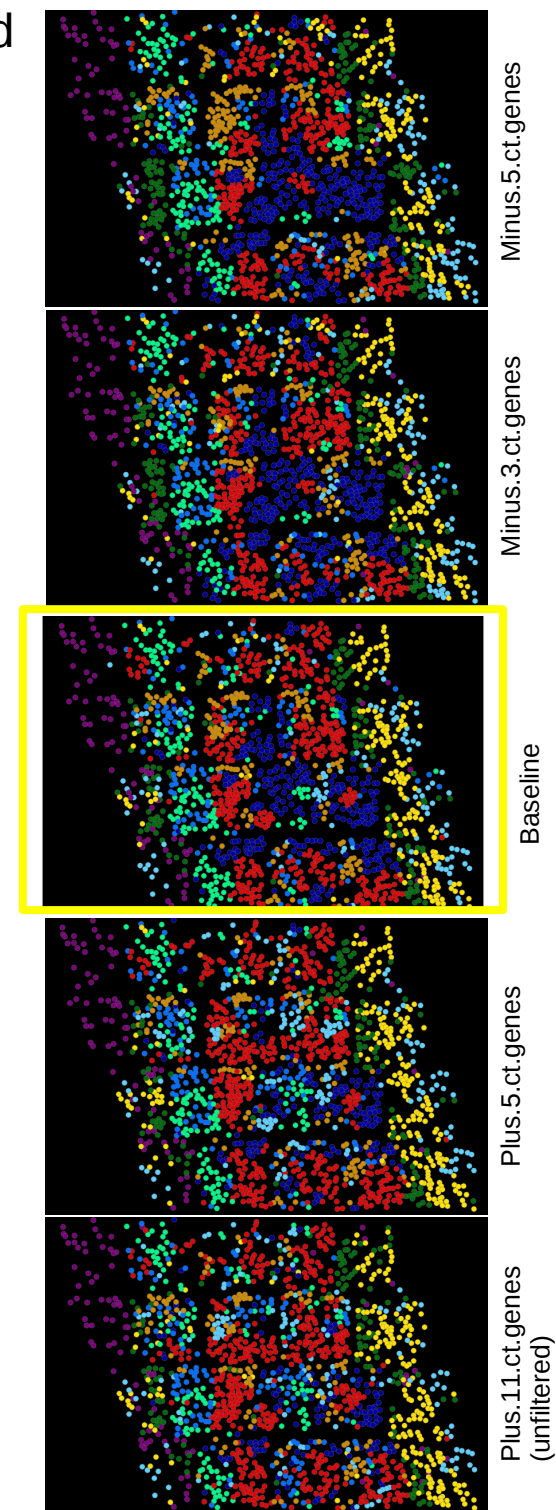

SFig 3

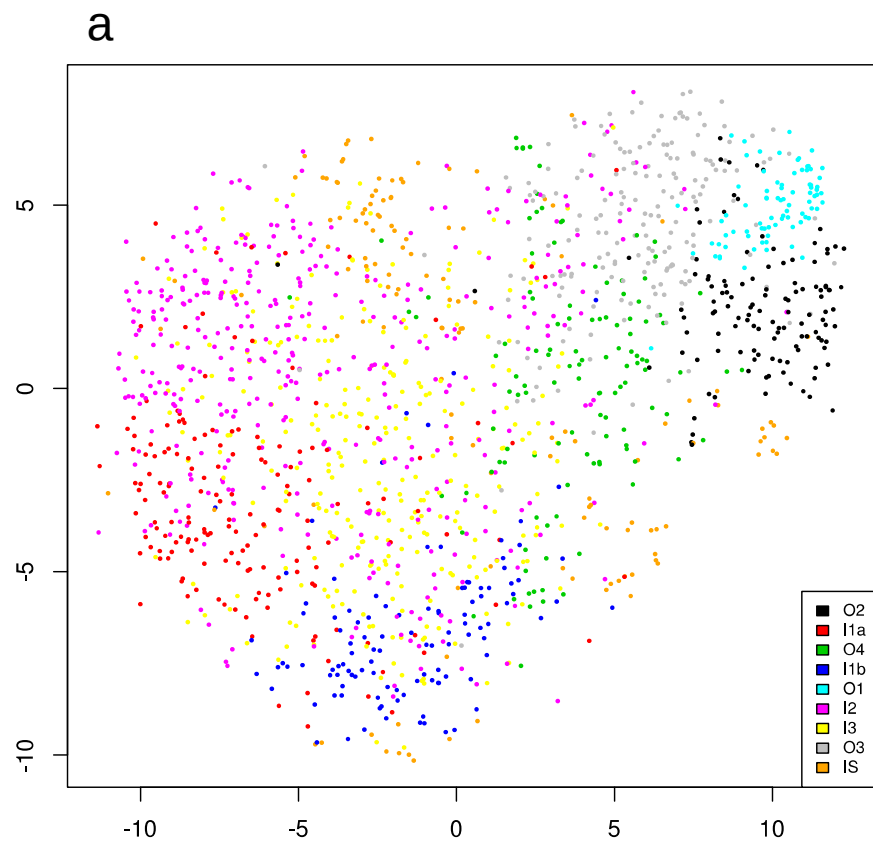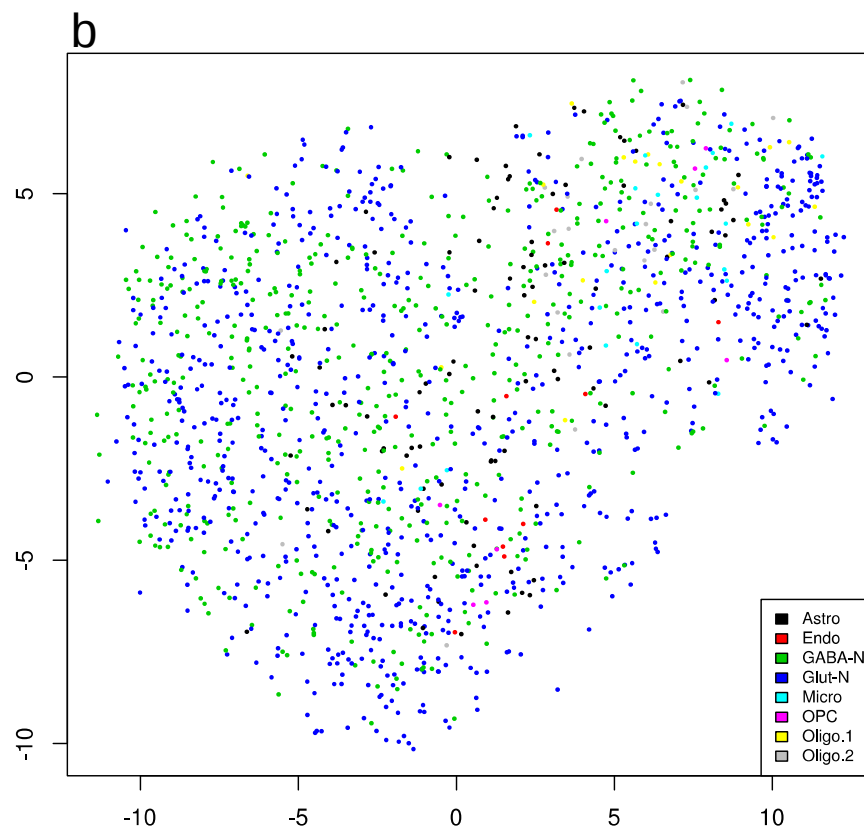

SFig 4

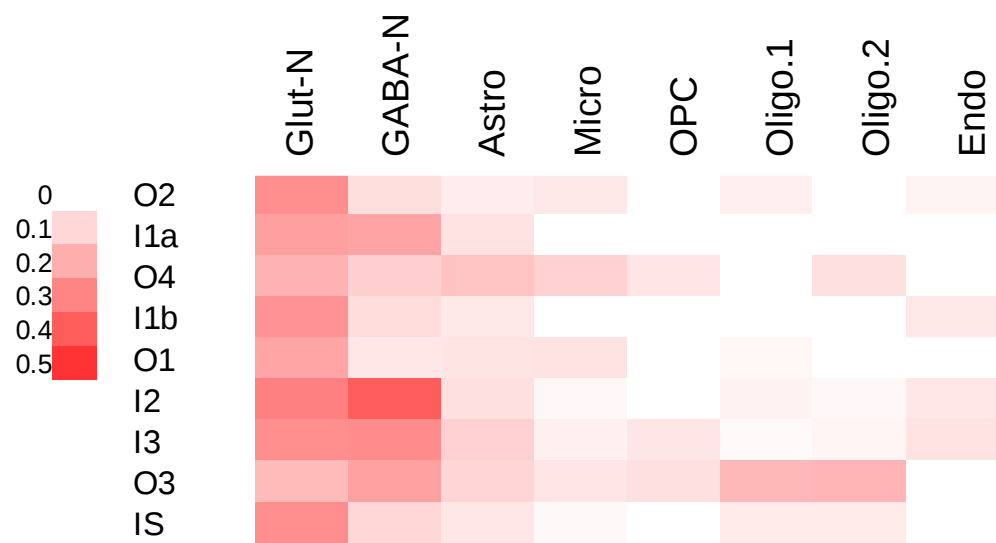

Gene *barhl1* for cortex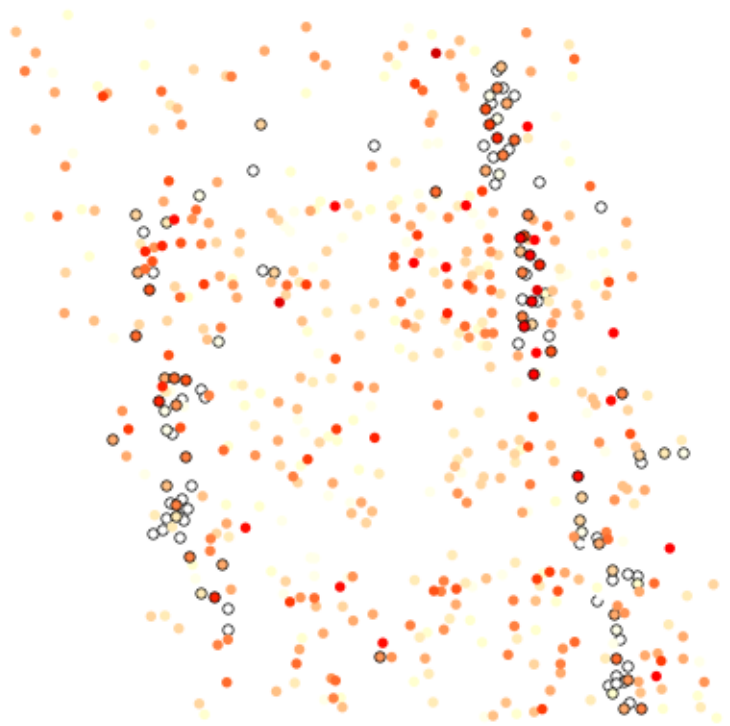Gene *nfk2* for cortex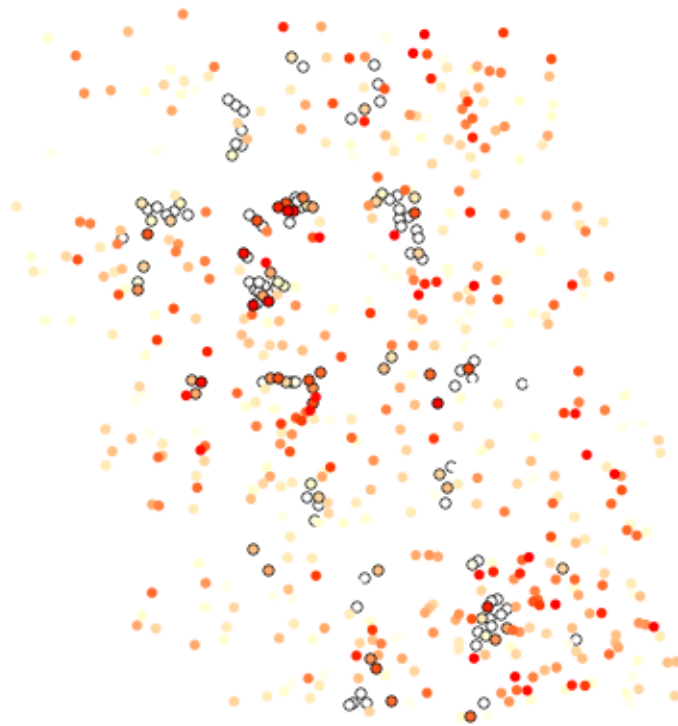Gene *col5a1* for cortex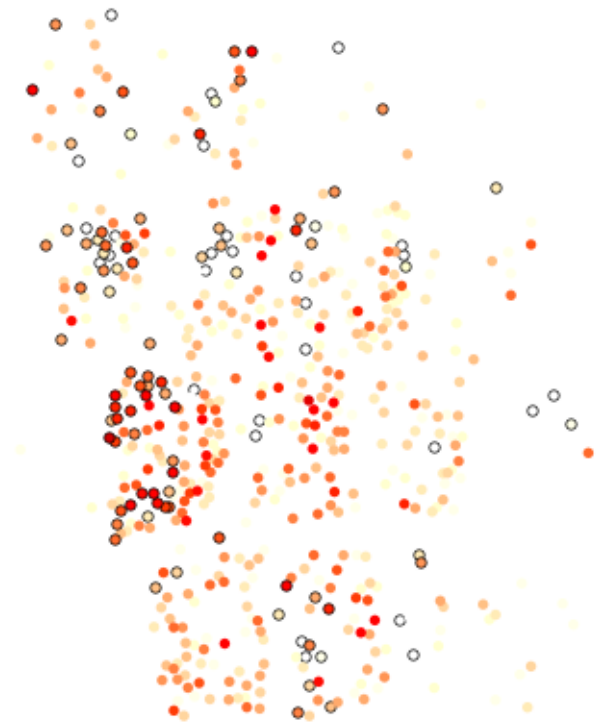Gene *aldh3b2* for cortex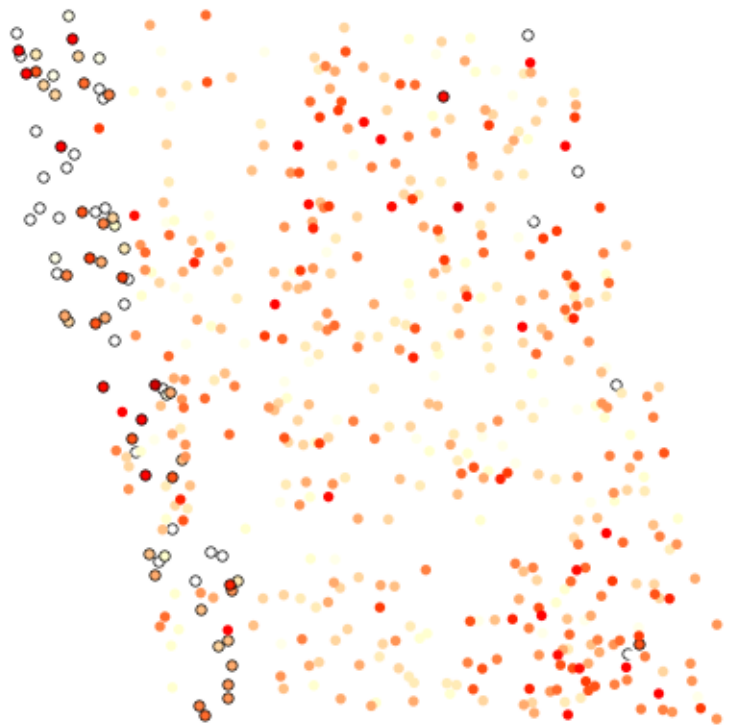Gene *calb1* for cortex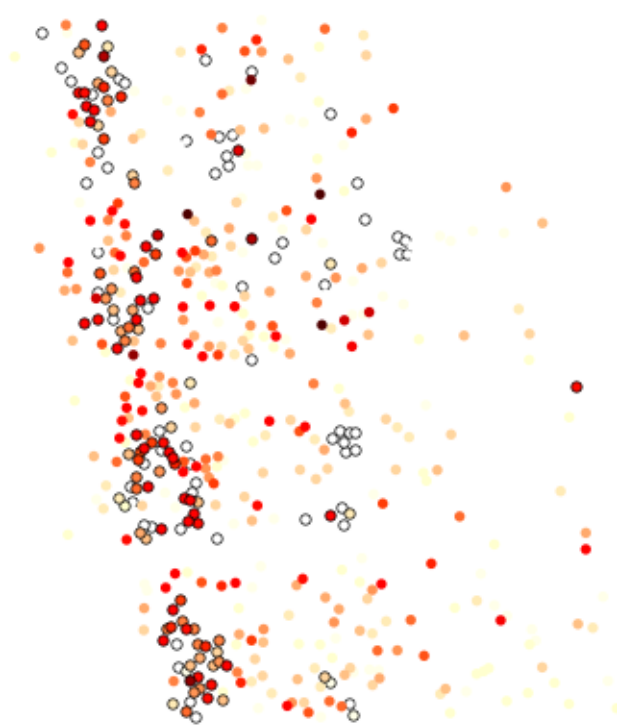Gene *omg* for cortex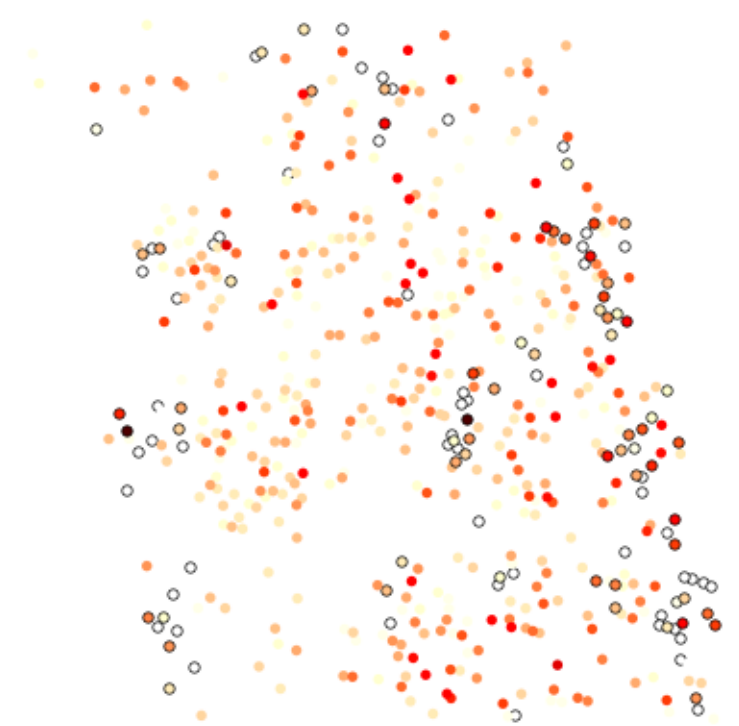Gene *nhlh1* for cortex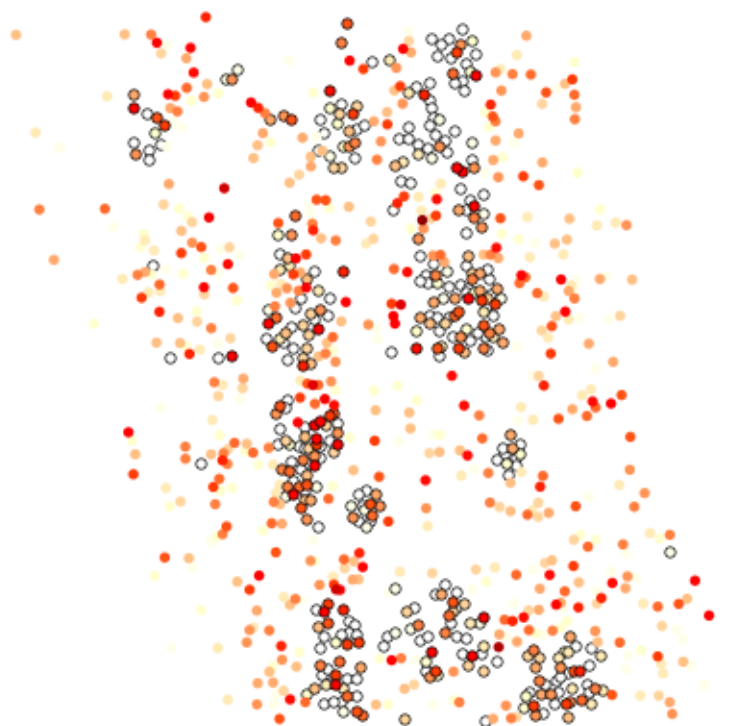Gene *gata6* for cortex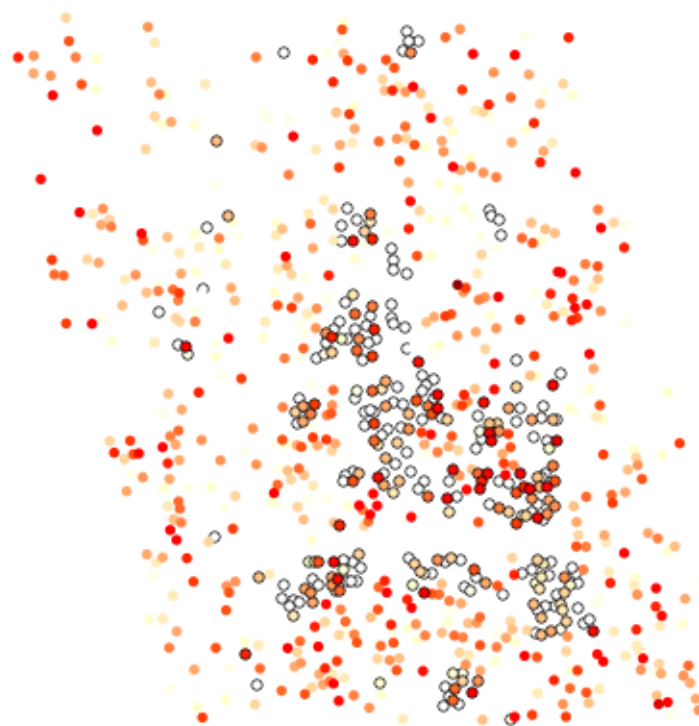Gene *pld1* for cortex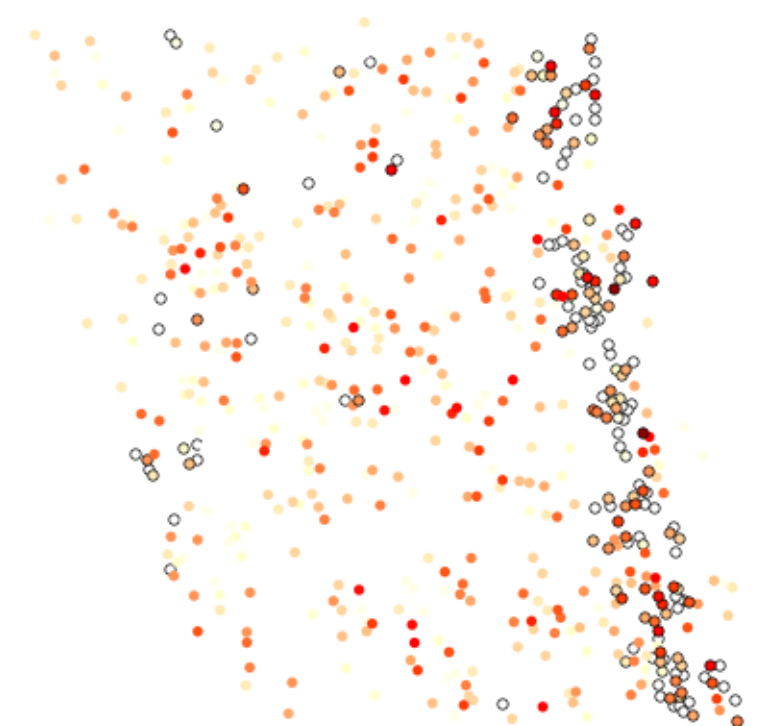

SFig 6

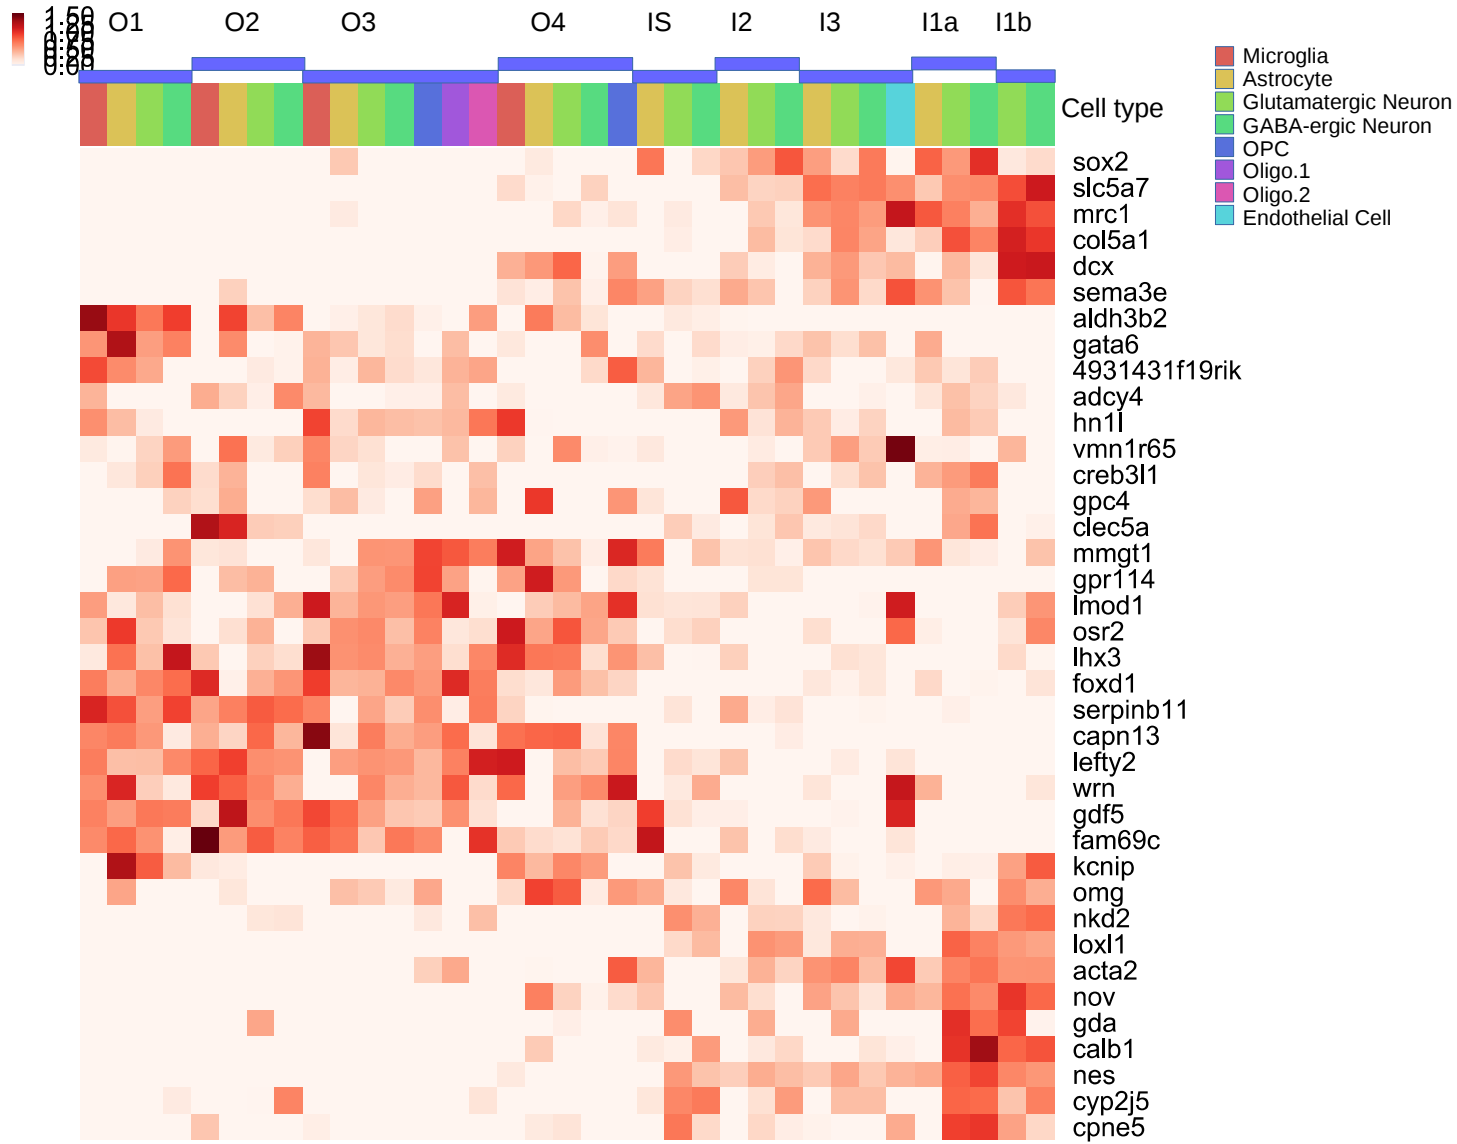

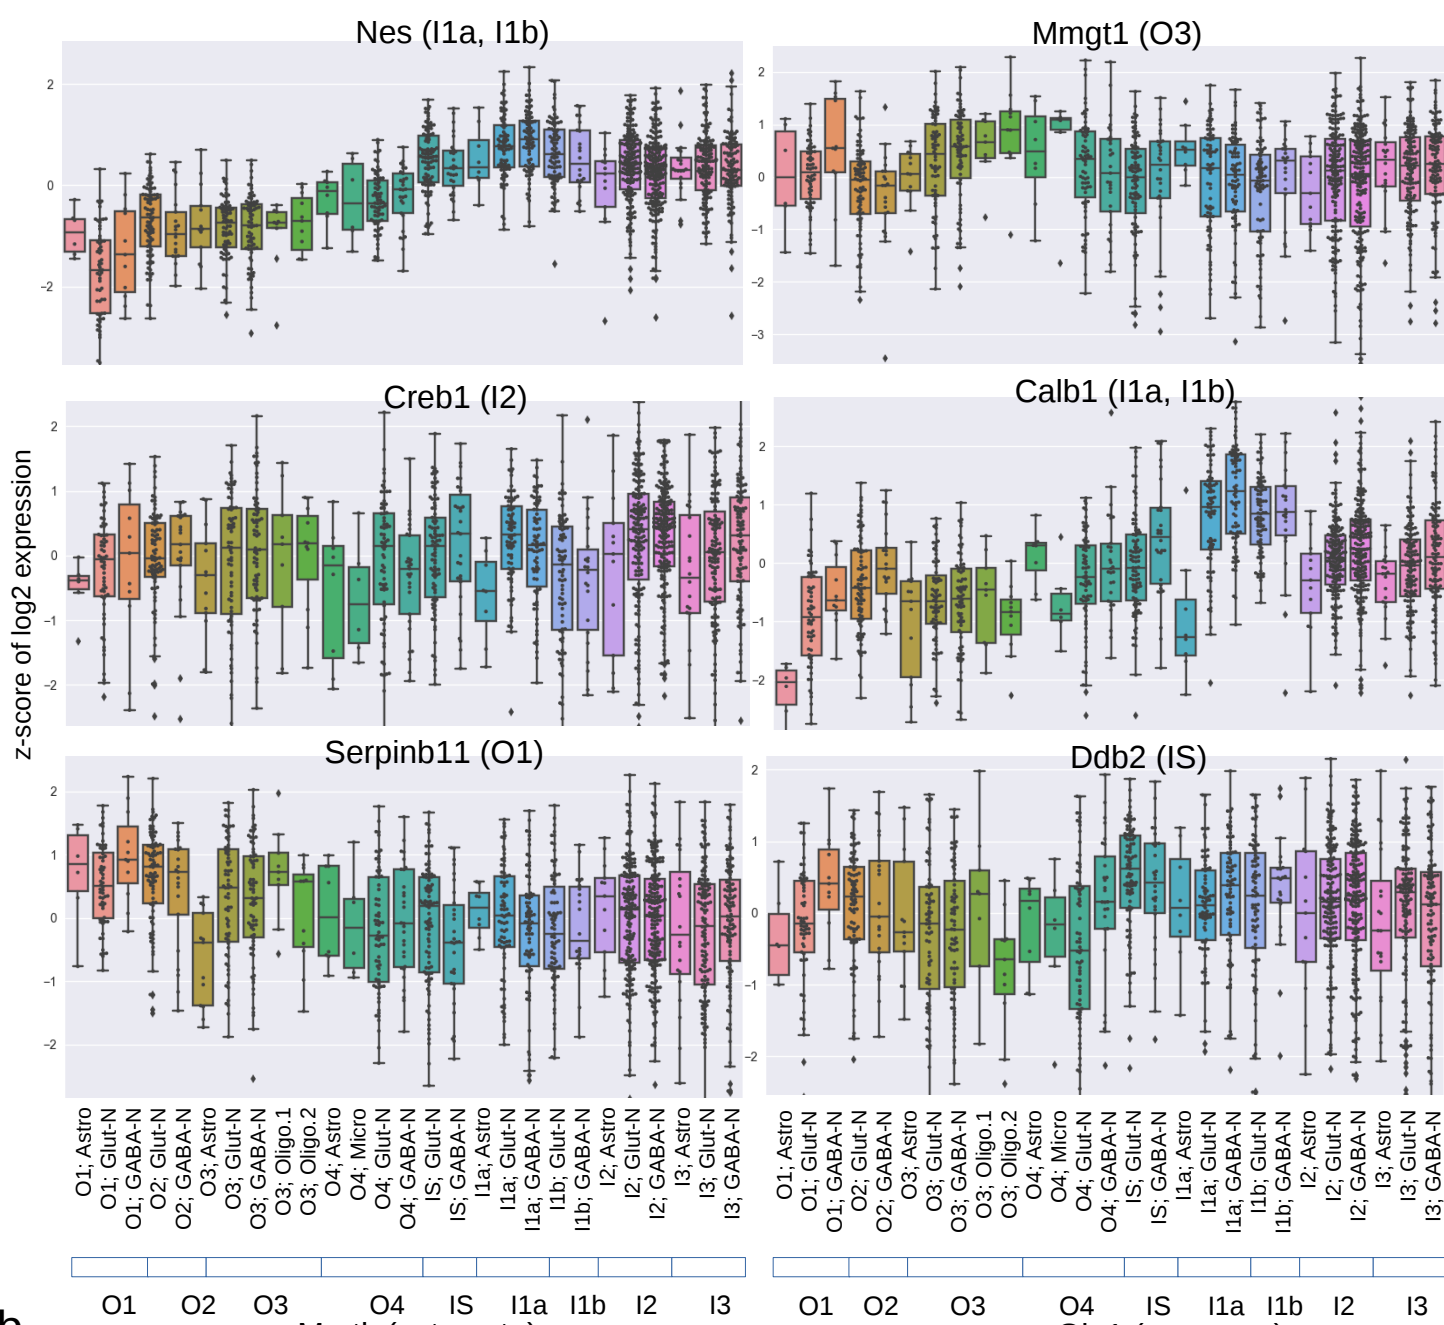

**b**

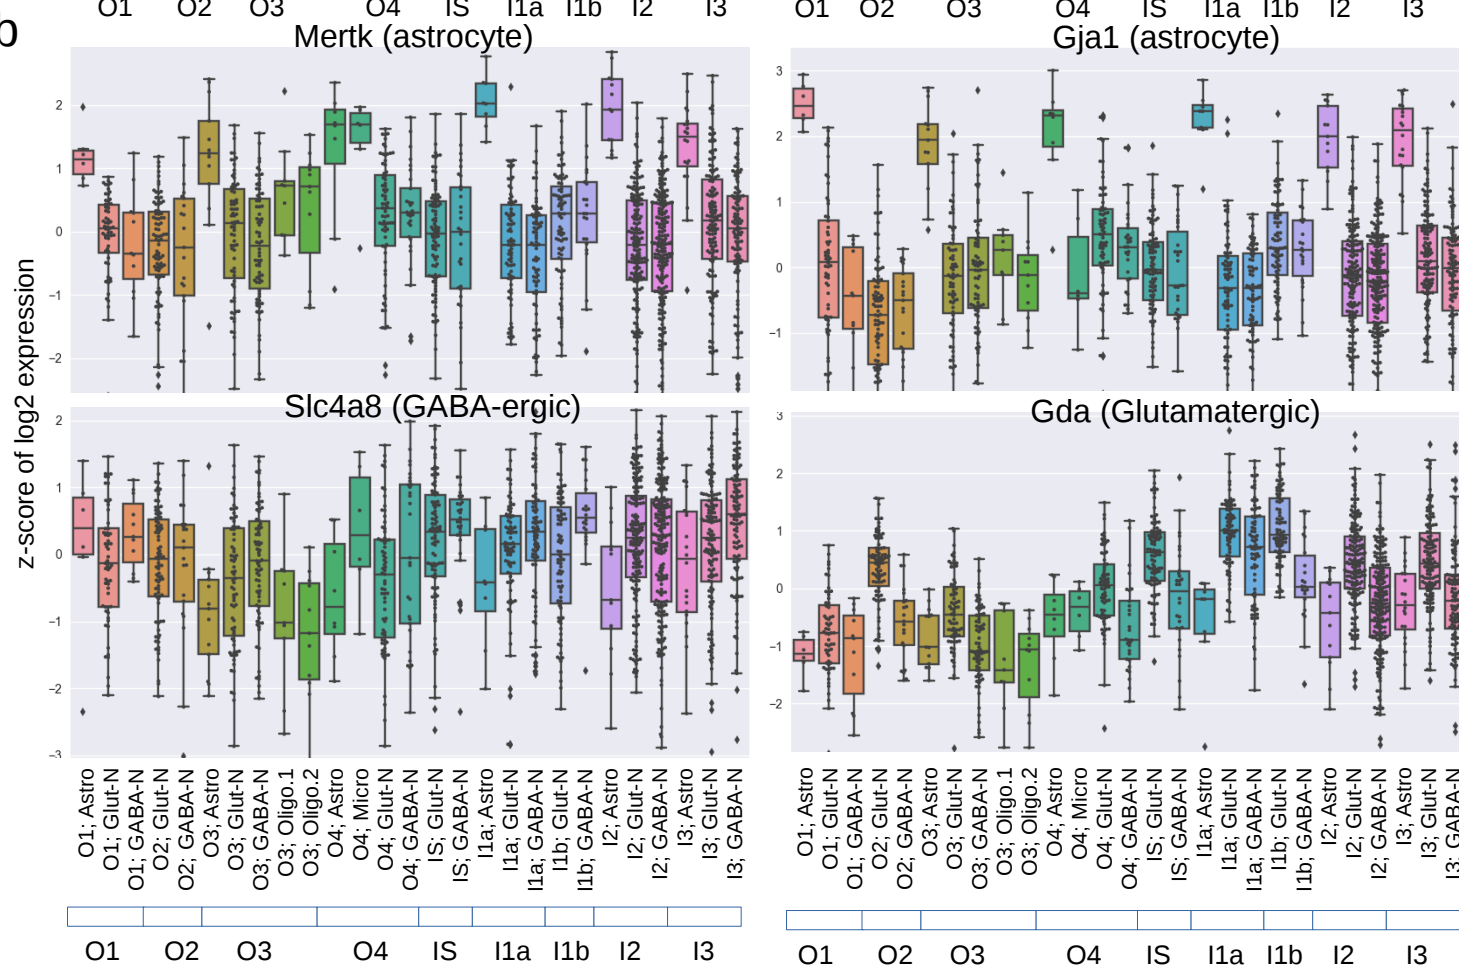

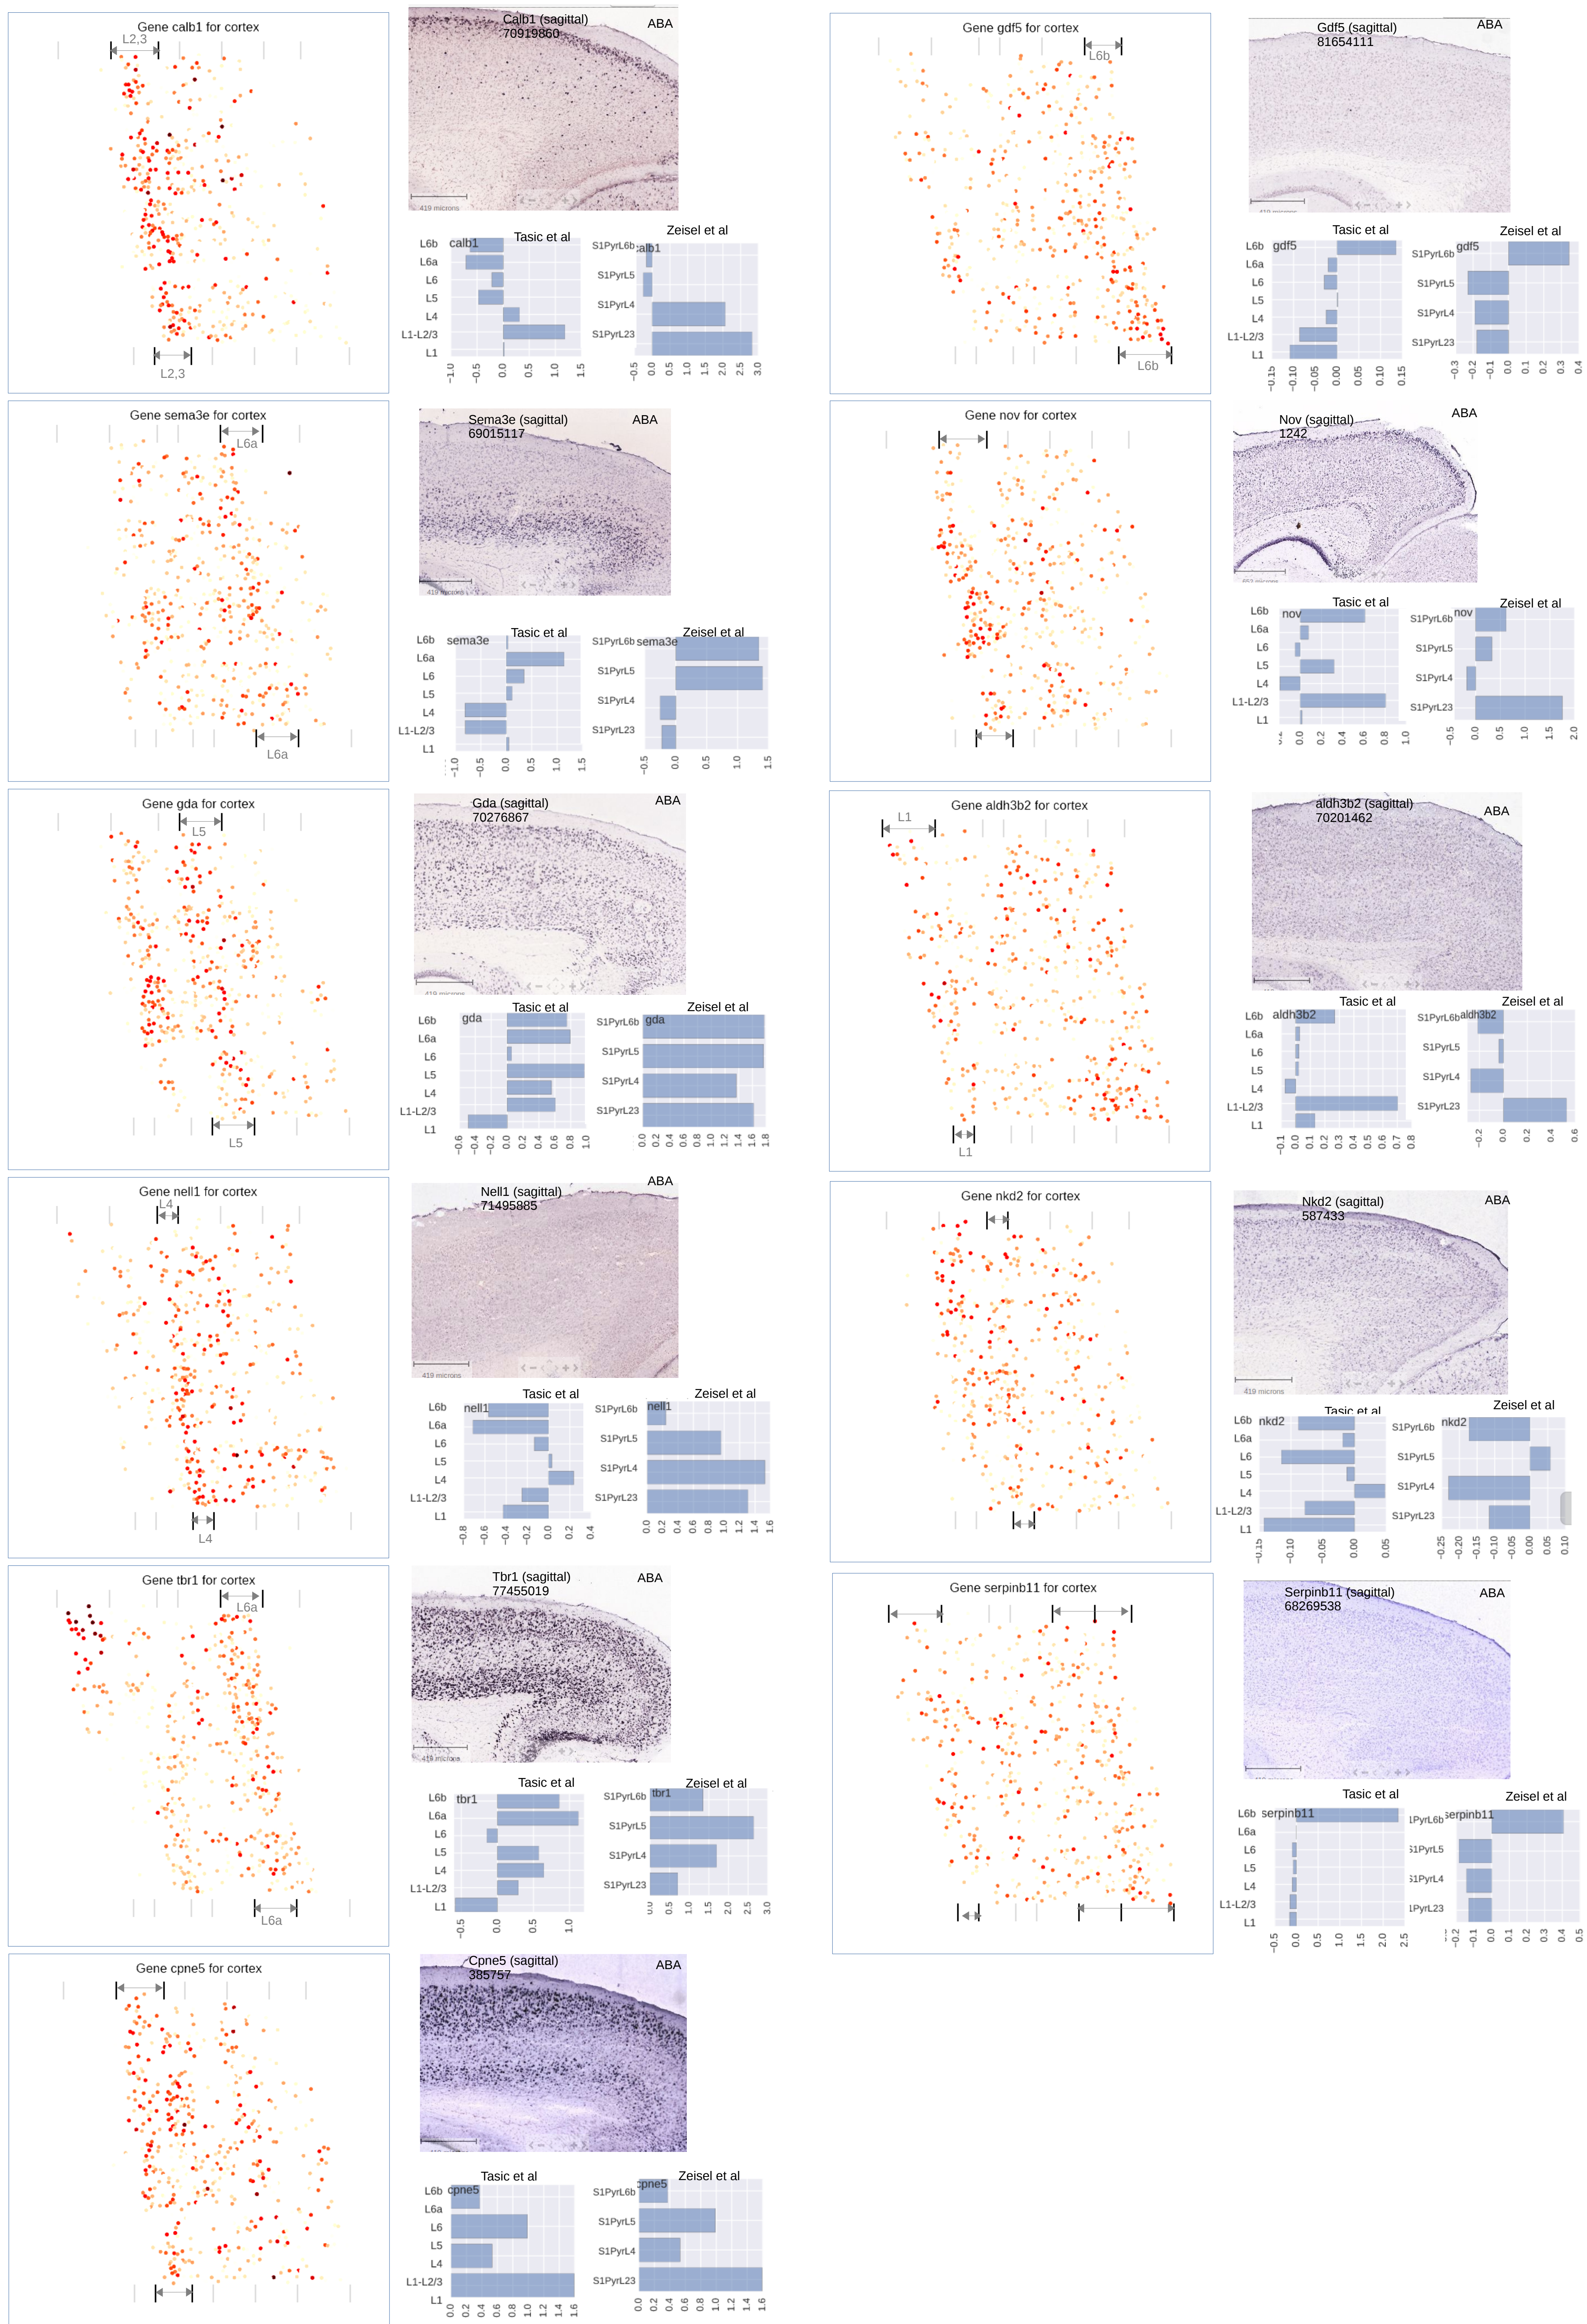



SFig 9

a

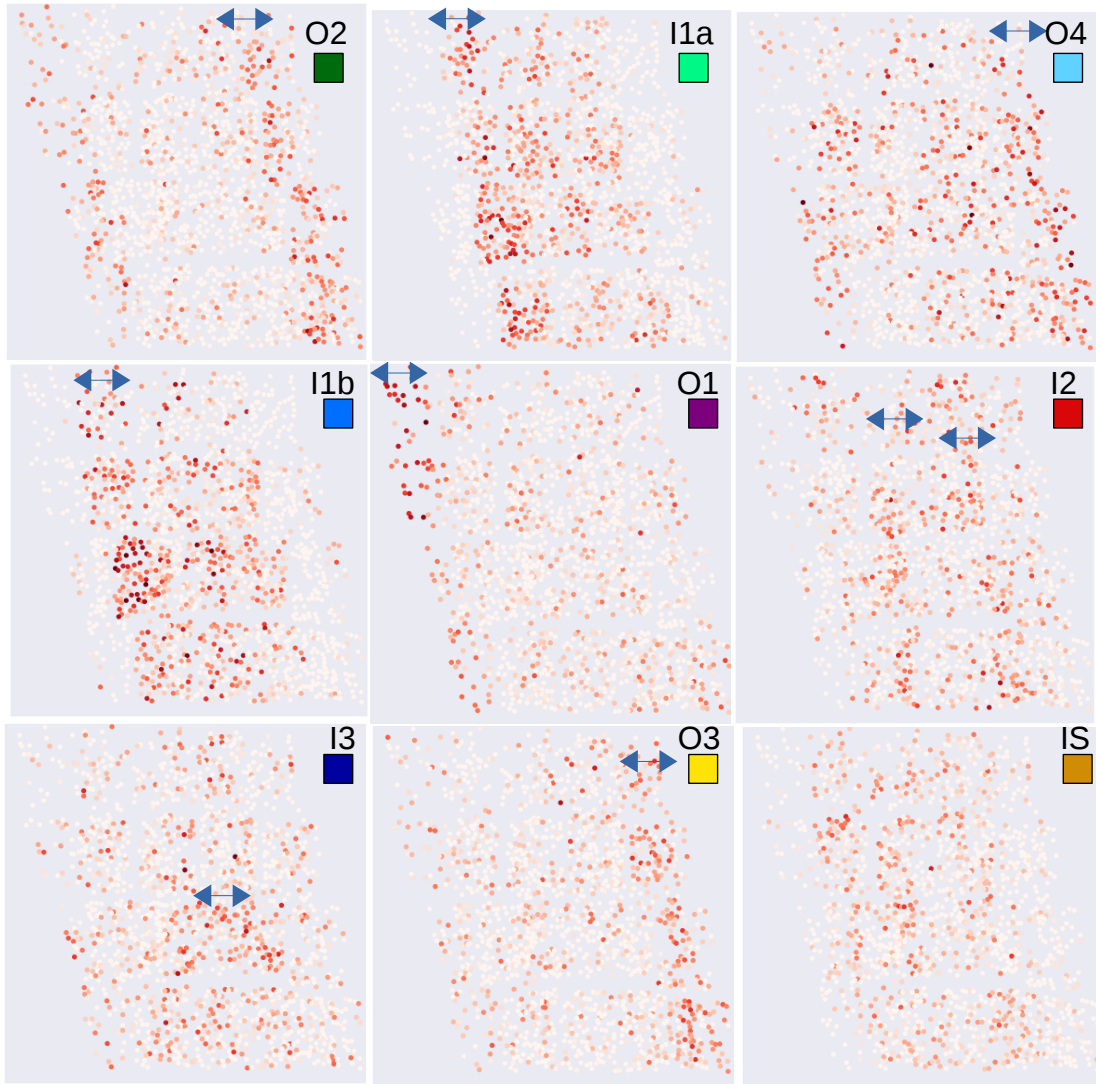

b

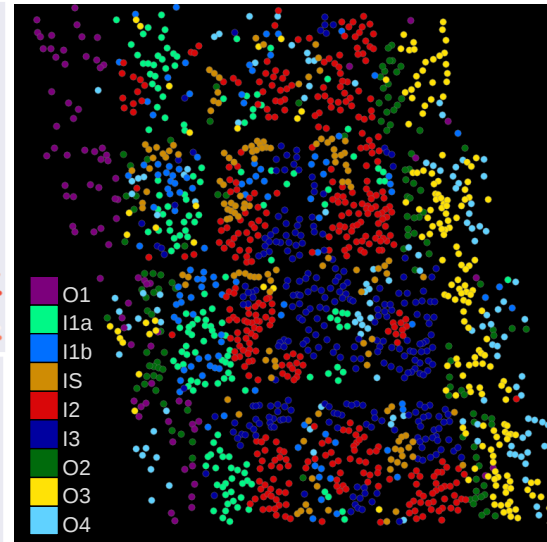

SFig 10

Glutamatergic cells

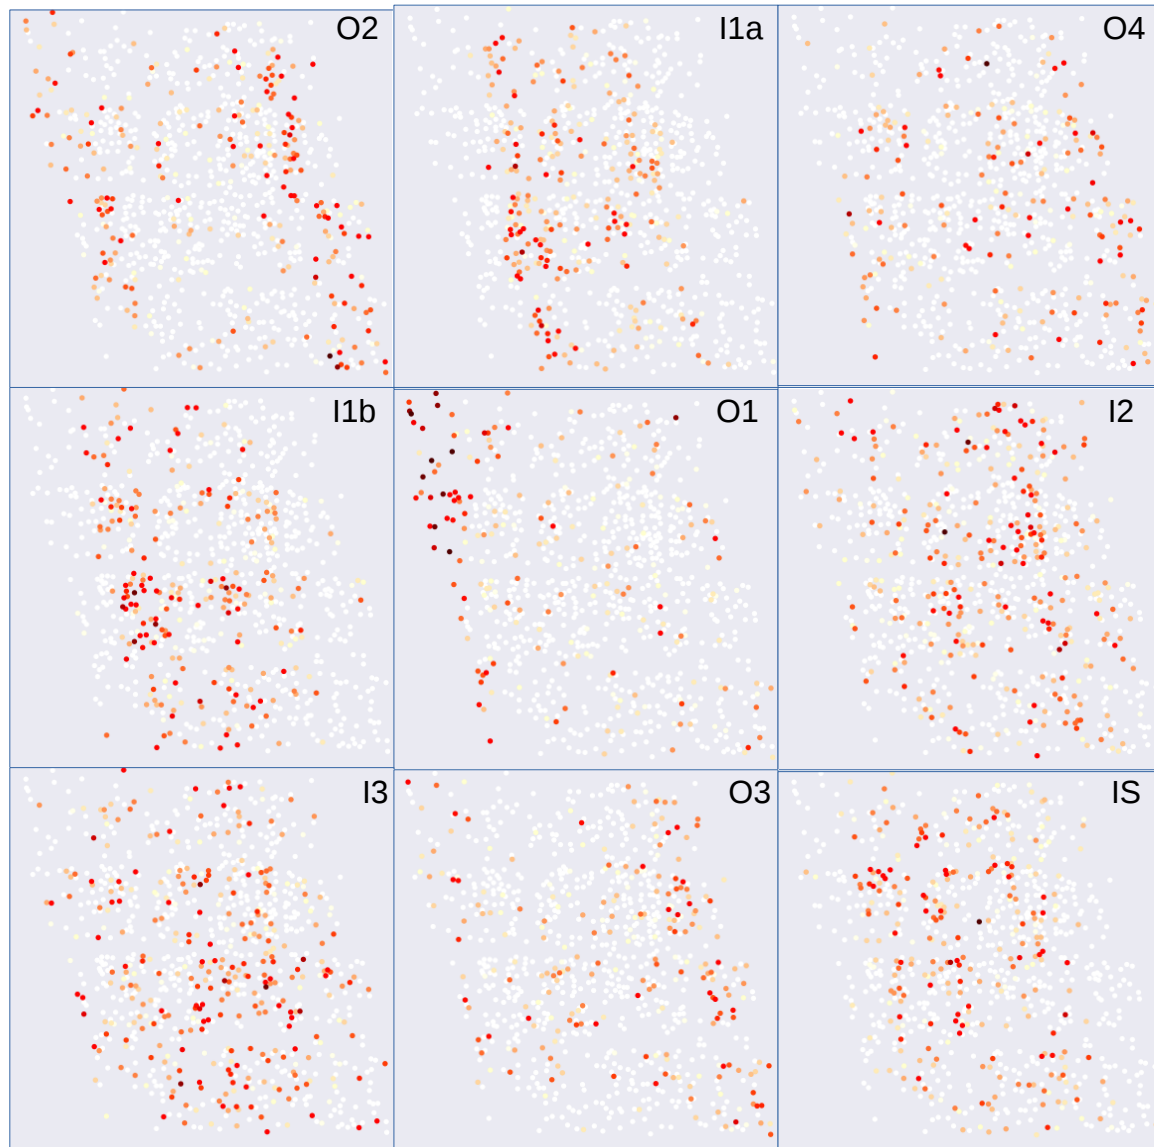

SFig 11

Spatial domain

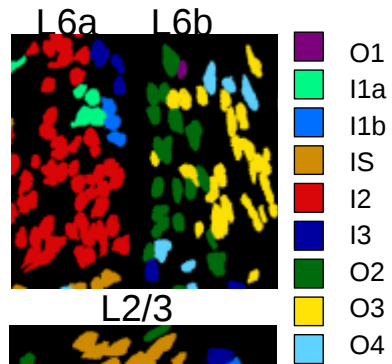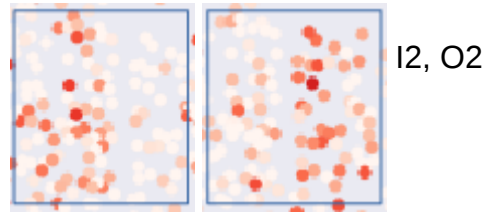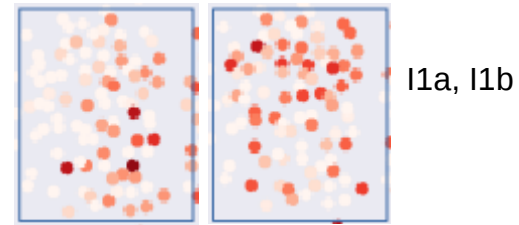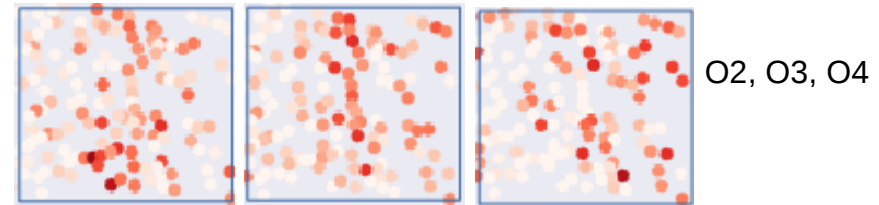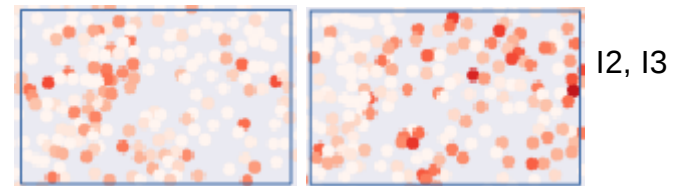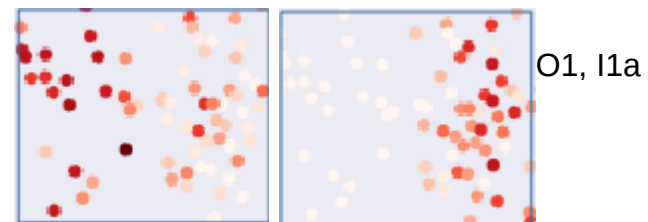

# SFig 12

a

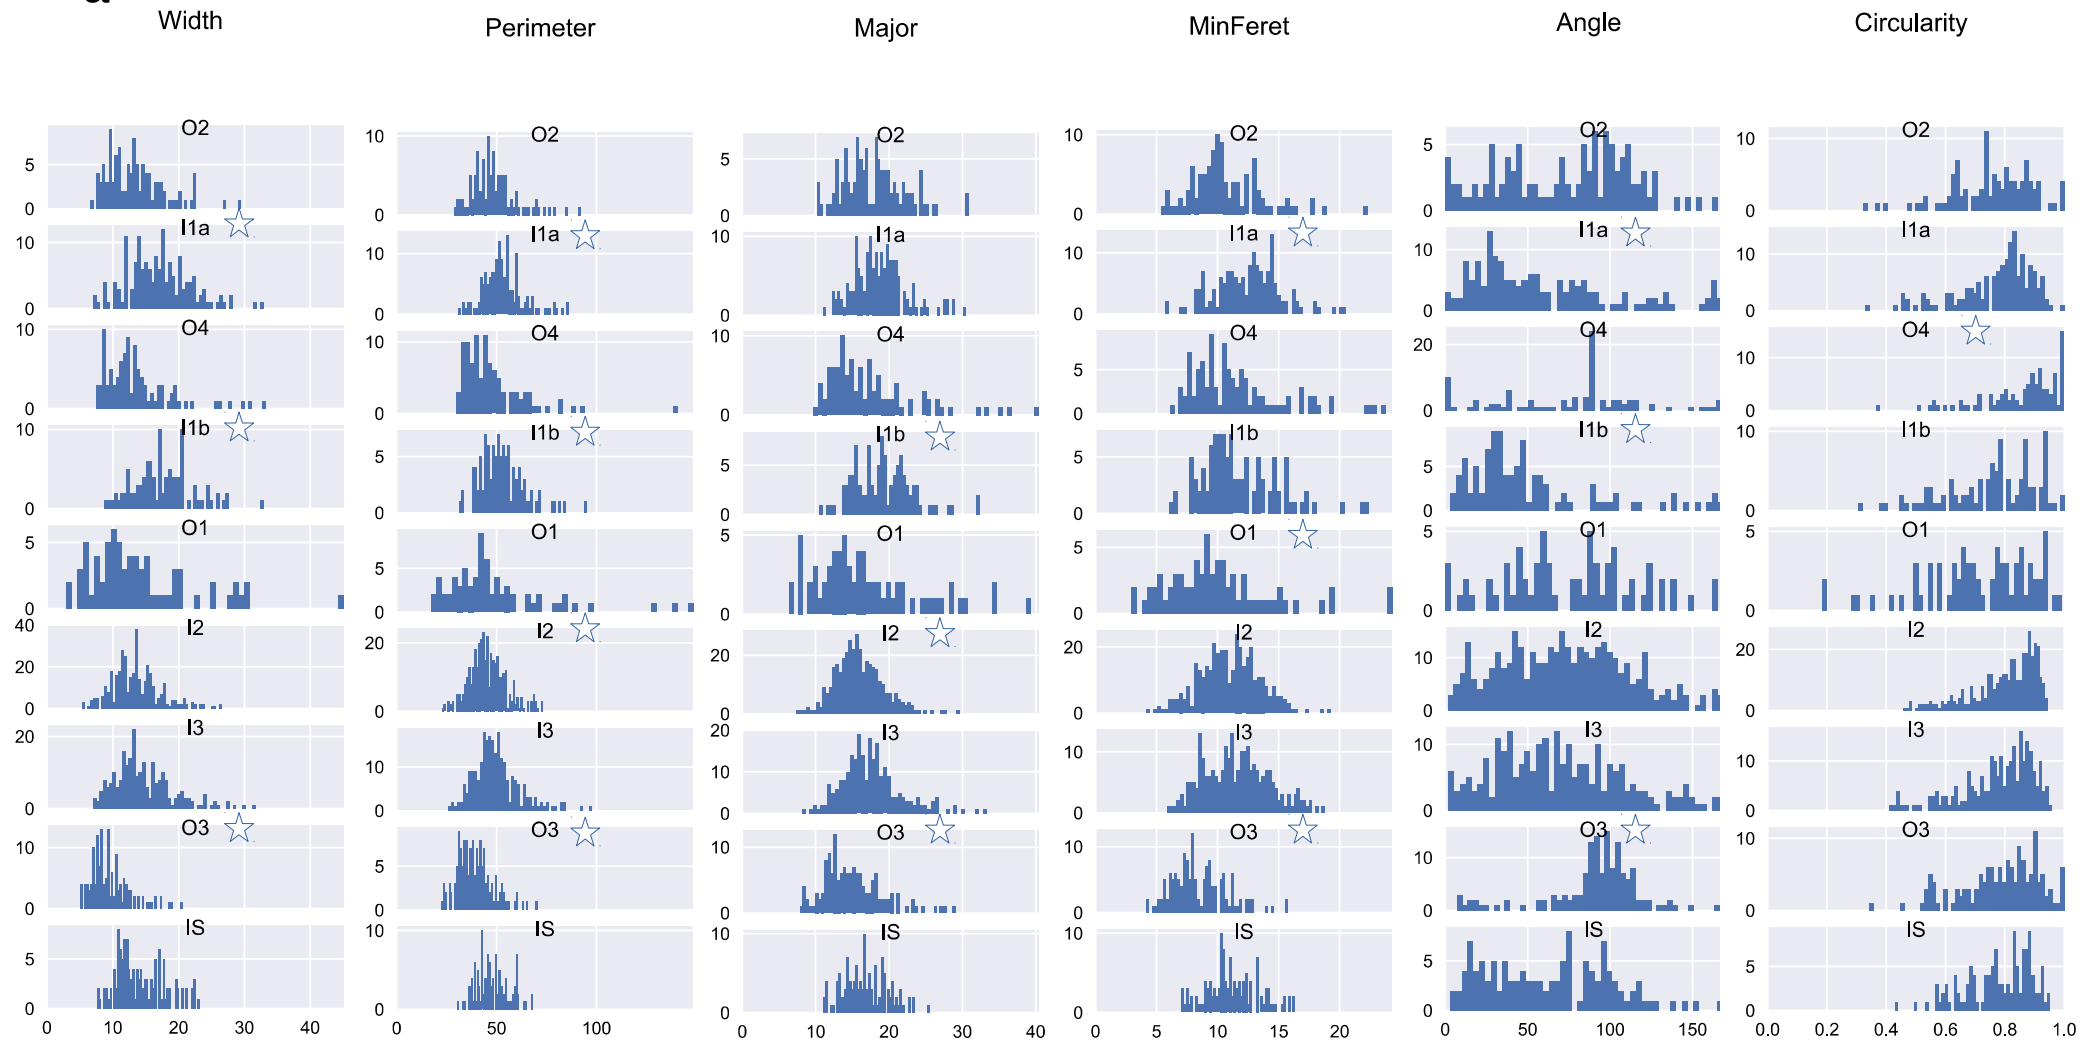

b

## Glutamatergic Cells

|     | Perimeter | Width    | Angle    | MinFeret | Circularity | Major    |
|-----|-----------|----------|----------|----------|-------------|----------|
| O2  | -         | -        | -        | -        | -           | -        |
| I1a | 1.78E-05  | 3.60E-08 | 8.17E-06 | -        | -           | -        |
| O4  | -         | -        | -        | -        | 7.00E-12    | -        |
| I1b | -         | 1.75E-10 | 7.90E-08 | -        | -           | -        |
| O1  | -         | -        | -        | 0.00288  | 4.46E-05    | -        |
| I2  | -         | -        | -        | -        | -           | 3.89E-05 |
| I3  | -         | 0.0158   | -        | -        | -           | -        |
| O3  | 4.46E-10  | 1.26E-19 | 2.53E-10 | 8.67E-14 | -           | -        |
| IS  | -         | -        | -        | -        | -           | -        |

## All cells

|     | Perimeter | Width    | Angle    | MinFeret | Circularity | Major    |
|-----|-----------|----------|----------|----------|-------------|----------|
| O2  | -         | -        | -        | -        | -           | -        |
| I1a | 1.07E-14  | 4.34E-17 | -        | 3.02E-11 | -           | -        |
| O4  | -         | -        | -        | -        | 6.18E-12    | -        |
| I1b | 1.24E-05  | 1.60E-14 | 6.28E-11 | -        | -           | 2.74E-06 |
| O1  | -         | -        | -        | 0.002773 | -           | -        |
| I2  | -         | -        | -        | -        | -           | 1.30E-08 |
| I3  | -         | -        | -        | -        | -           | -        |
| O3  | 2.32E-20  | 6.80E-37 | 6.70E-18 | 5.27E-26 | -           | 1.50E-10 |
| IS  | -         | -        | -        | -        | -           | -        |

**SFig 13**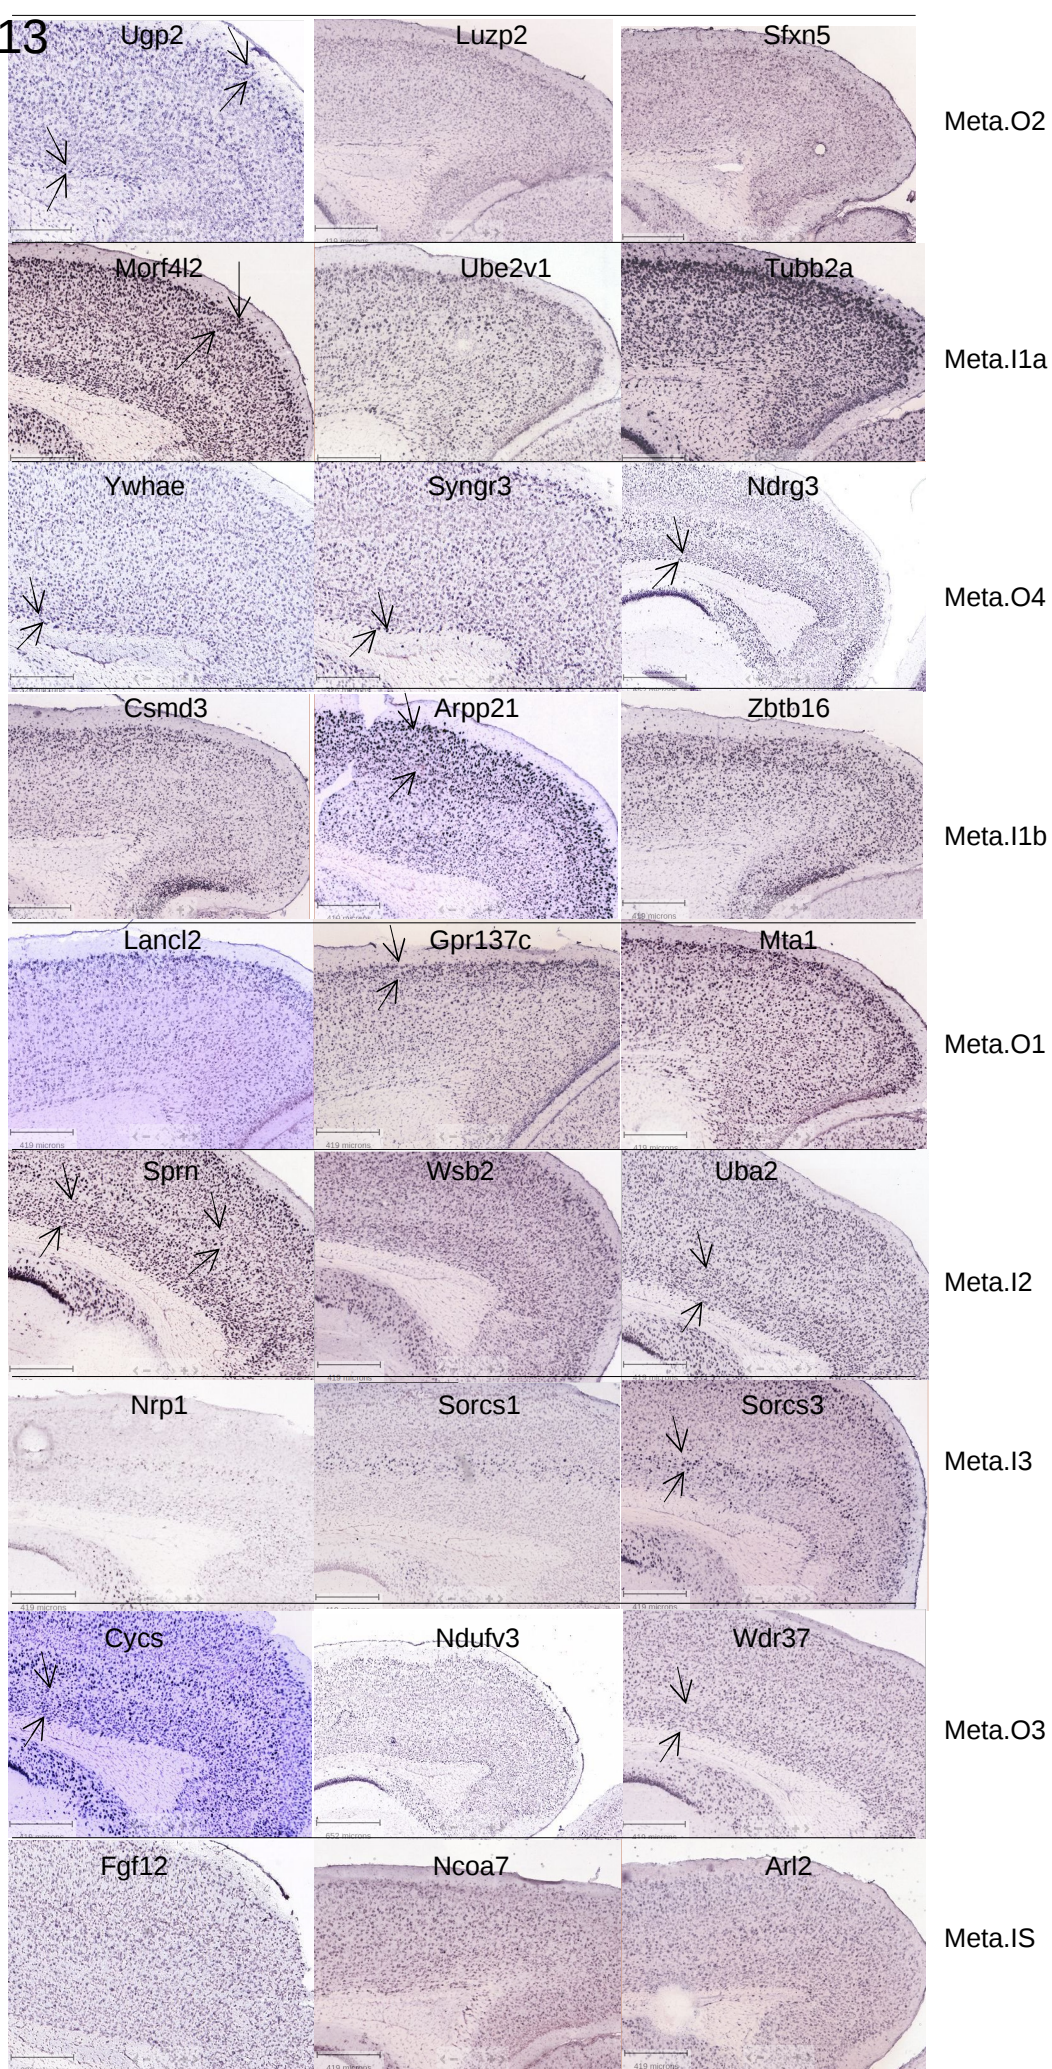

# SFig 14

## Gene overlap (within 125 genes)

## Cell overlap

$-\log_{10}(P)$

0  
2  
4  
6  
8  
10

|               | I1a  | I1b  | I2   | I3  | IS  | O1  | O2  | O3  | O4  |
|---------------|------|------|------|-----|-----|-----|-----|-----|-----|
| L2/3_Ptgs2    | 10.2 | 2.3  | 0.5  | 1.1 | 3.7 | 5.7 | 2.5 | 0.8 | 3.7 |
| L2_Ngb        | 9.4  | 2.8  | 0.7  | 1.4 | 2.7 | 2.8 | 1.3 | 1.0 | 4.2 |
| L4_Arf5       | 3.9  | 2.3  | 1.2  | 2.7 | 2.2 | 3.9 | 2.5 | 1.9 | 1.5 |
| L4_Ctxn3      | 1.9  | 0.8  | 10.0 | 1.0 | 0.7 | 0.8 | 3.8 | 7.4 | 1.4 |
| L4_Scnn1a     | 1.5  | 1.5  | 10.0 | 0.8 | 0.5 | 4.0 | 1.7 | 7.5 | 1.1 |
| L5_Chma6      | 1.5  | 1.5  | 1.0  | 1.7 | 1.5 | 6.2 | 3.9 | 3.2 | 2.1 |
| L5_Ucma       | 1.4  | 5.6  | 2.2  | 6.3 | 1.4 | 1.4 | 1.5 | 1.2 | 2.0 |
| L5a_Batf3     | 2.8  | 2.8  | 2.9  | 1.4 | 2.7 | 2.8 | 1.3 | 1.0 | 1.8 |
| L5a_Hsd11b1   | 1.3  | 3.1  | 2.0  | 1.5 | 5.0 | 1.3 | 1.4 | 2.7 | 1.9 |
| L5a_Pde1c     | 1.5  | 3.6  | 2.5  | 4.0 | 1.5 | 1.5 | 1.7 | 1.4 | 2.1 |
| L5a_Tcerg1l   | 1.0  | 2.0  | 1.5  | 2.2 | 2.0 | 2.0 | 2.1 | 1.8 | 2.6 |
| L5b_Cdh13     | 4.5  | 6.6  | 1.5  | 5.2 | 4.3 | 1.1 | 1.2 | 0.9 | 1.0 |
| L5b_Tph2      | 6.1  | 10.8 | 0.5  | 4.9 | 2.3 | 1.0 | 1.1 | 2.1 | 3.9 |
| L6a_Car12     | 3.6  | 3.6  | 1.0  | 4.0 | 1.5 | 1.5 | 1.7 | 1.4 | 2.1 |
| L6a_Mgp       | 0.8  | 8.9  | 10.0 | 4.0 | 0.7 | 0.8 | 2.2 | 2.7 | 1.4 |
| L6a_Sla       | 1.1  | 9.0  | 1.5  | 3.1 | 1.1 | 2.6 | 2.9 | 2.3 | 1.7 |
| L6a_Syt17     | 5.6  | 5.6  | 0.9  | 6.3 | 1.4 | 1.4 | 1.5 | 1.2 | 2.0 |
| L6b_Rgs12     | 1.7  | 1.0  | 1.2  | 4.5 | 1.7 | 1.7 | 1.8 | 1.5 | 2.3 |
| L6b_Serpinb11 | 1.3  | 1.3  | 2.0  | 1.5 | 3.0 | 3.1 | 8.4 | 4.6 | 1.9 |

|               | I1a  | I1b  | I2  | I3  | IS  | O1  | O2   | O3  | O4  |
|---------------|------|------|-----|-----|-----|-----|------|-----|-----|
| L2/3_Ptgs2    | 10.1 | 0.0  | 0.0 | 0.0 | 0.8 | 3.3 | 0.0  | 0.0 | 0.1 |
| L2_Ngb        | 1.5  | 1.0  | 0.1 | 0.0 | 0.1 | 1.0 | 0.1  | 0.2 | 2.7 |
| L4_Arf5       | 0.2  | 0.0  | 0.9 | 0.1 | 0.6 | 1.8 | 0.2  | 1.1 | 0.1 |
| L4_Ctxn3      | 0.2  | 0.1  | 0.8 | 0.1 | 0.3 | 0.0 | 2.8  | 2.1 | 0.0 |
| L4_Scnn1a     | 0.0  | 0.0  | 0.9 | 0.0 | 0.3 | 0.4 | 0.9  | 4.4 | 0.1 |
| L5_Chma6      | 0.1  | 0.1  | 0.4 | 0.5 | 0.4 | 3.3 | 0.3  | 0.6 | 0.6 |
| L5_Ucma       | 0.1  | 0.2  | 0.6 | 1.1 | 0.5 | 1.5 | 0.2  | 0.6 | 0.4 |
| L5a_Batf3     | 0.4  | 0.0  | 3.8 | 0.0 | 2.1 | 0.3 | 0.1  | 0.2 | 0.6 |
| L5a_Hsd11b1   | 0.0  | 0.0  | 0.1 | 0.3 | 2.7 | 0.0 | 0.8  | 2.7 | 1.3 |
| L5a_Pde1c     | 1.2  | 0.0  | 1.8 | 0.5 | 0.4 | 0.1 | 0.1  | 0.4 | 1.9 |
| L5a_Tcerg1l   | 0.2  | 0.0  | 0.4 | 0.1 | 3.5 | 0.5 | 0.0  | 1.4 | 0.2 |
| L5b_Cdh13     | 2.1  | 0.9  | 0.5 | 1.6 | 0.0 | 0.0 | 0.0  | 0.1 | 5.3 |
| L5b_Tph2      | 0.7  | 3.1  | 0.1 | 1.0 | 0.3 | 0.0 | 0.0  | 0.2 | 1.3 |
| L6a_Car12     | 0.6  | 0.1  | 0.6 | 6.7 | 0.0 | 0.0 | 0.7  | 0.0 | 0.3 |
| L6a_Mgp       | 0.1  | 2.5  | 0.2 | 3.3 | 0.0 | 0.2 | 0.1  | 0.1 | 0.1 |
| L6a_Sla       | 0.0  | 12.9 | 0.0 | 0.9 | 0.0 | 1.4 | 0.0  | 0.0 | 0.1 |
| L6a_Syt17     | 0.3  | 1.6  | 0.6 | 1.2 | 0.3 | 0.3 | 0.2  | 0.1 | 1.2 |
| L6b_Rgs12     | 0.1  | 3.0  | 0.3 | 0.7 | 0.1 | 0.7 | 1.8  | 0.0 | 0.5 |
| L6b_Serpinb11 | 0.0  | 0.0  | 0.0 | 0.1 | 0.4 | 0.4 | 14.2 | 0.1 | 0.4 |

SFig 15

a

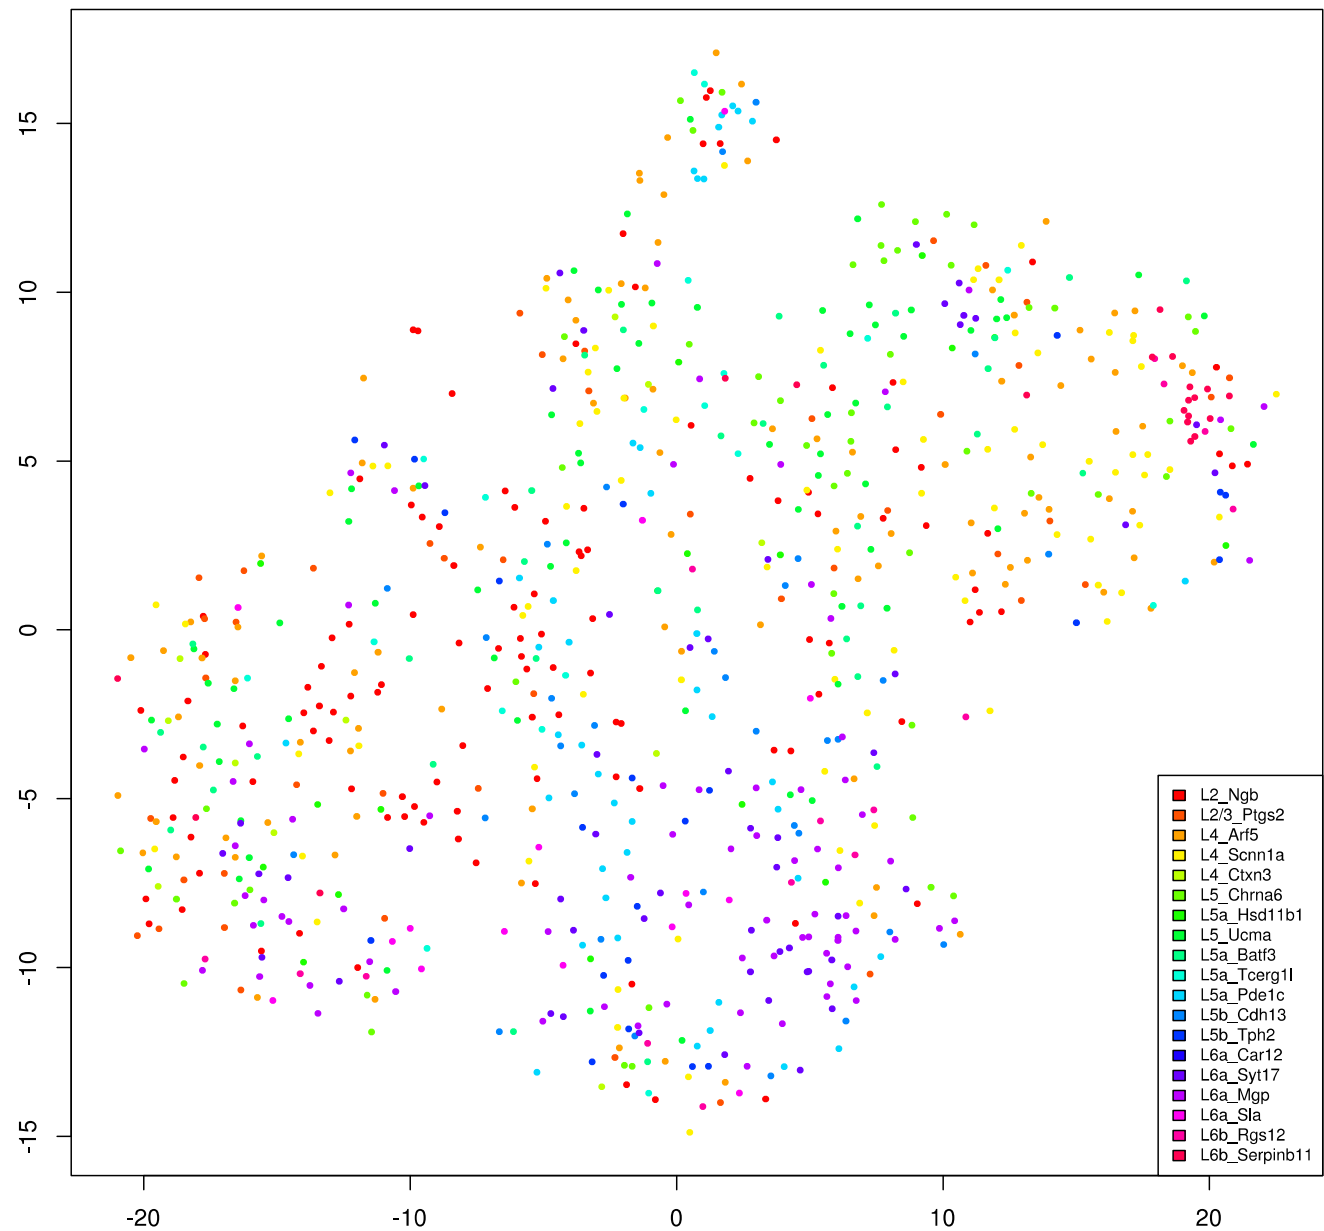

b

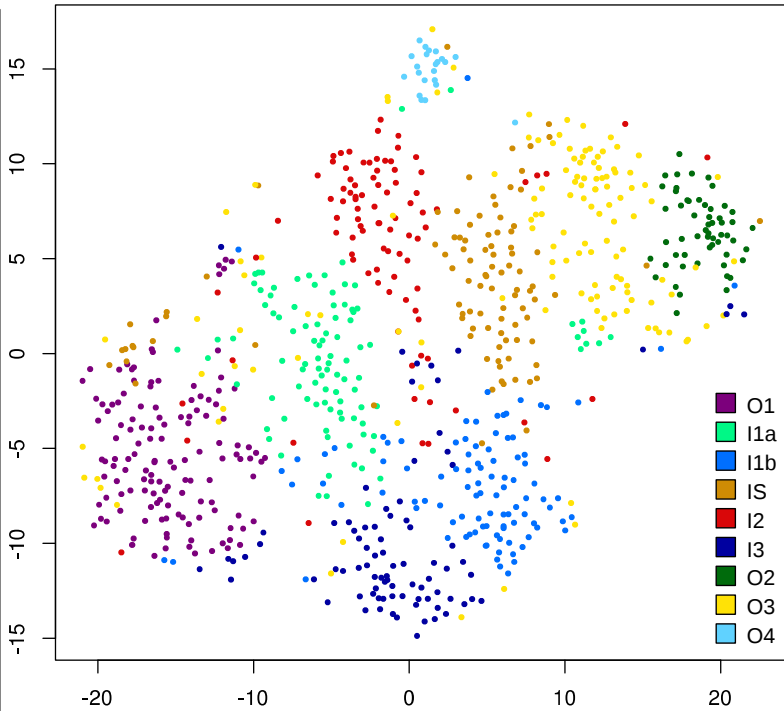

# SFig 16

a

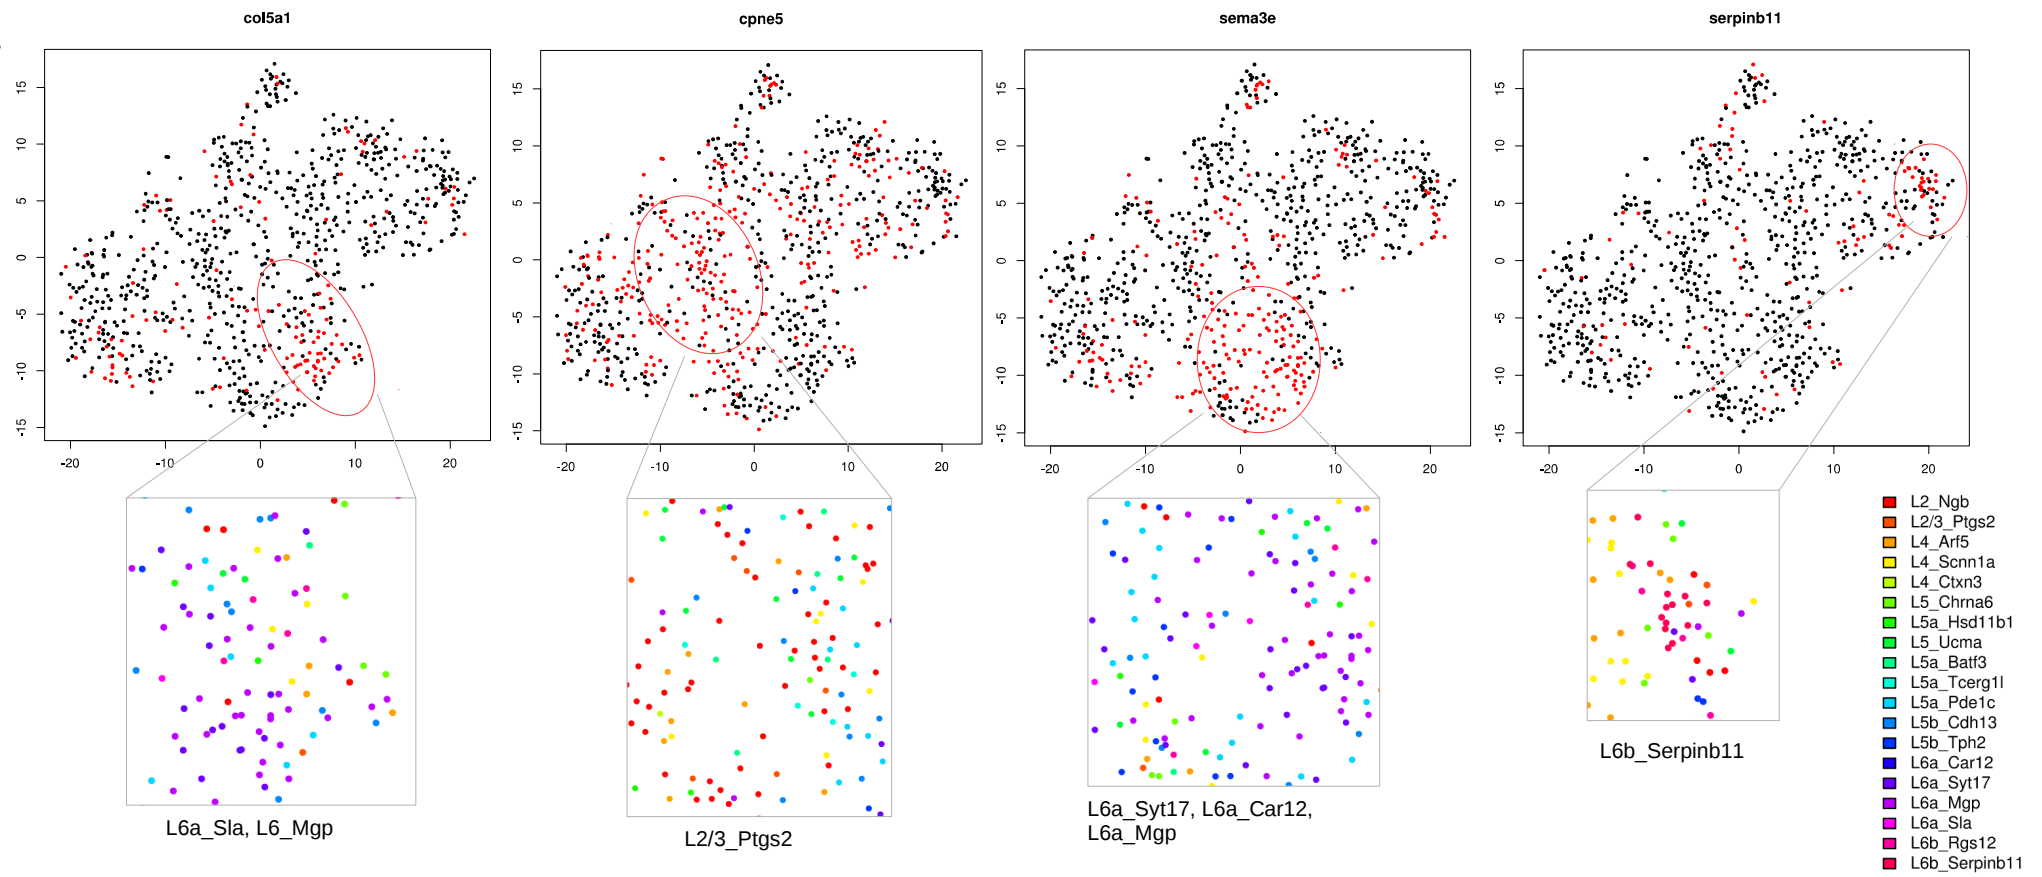

b

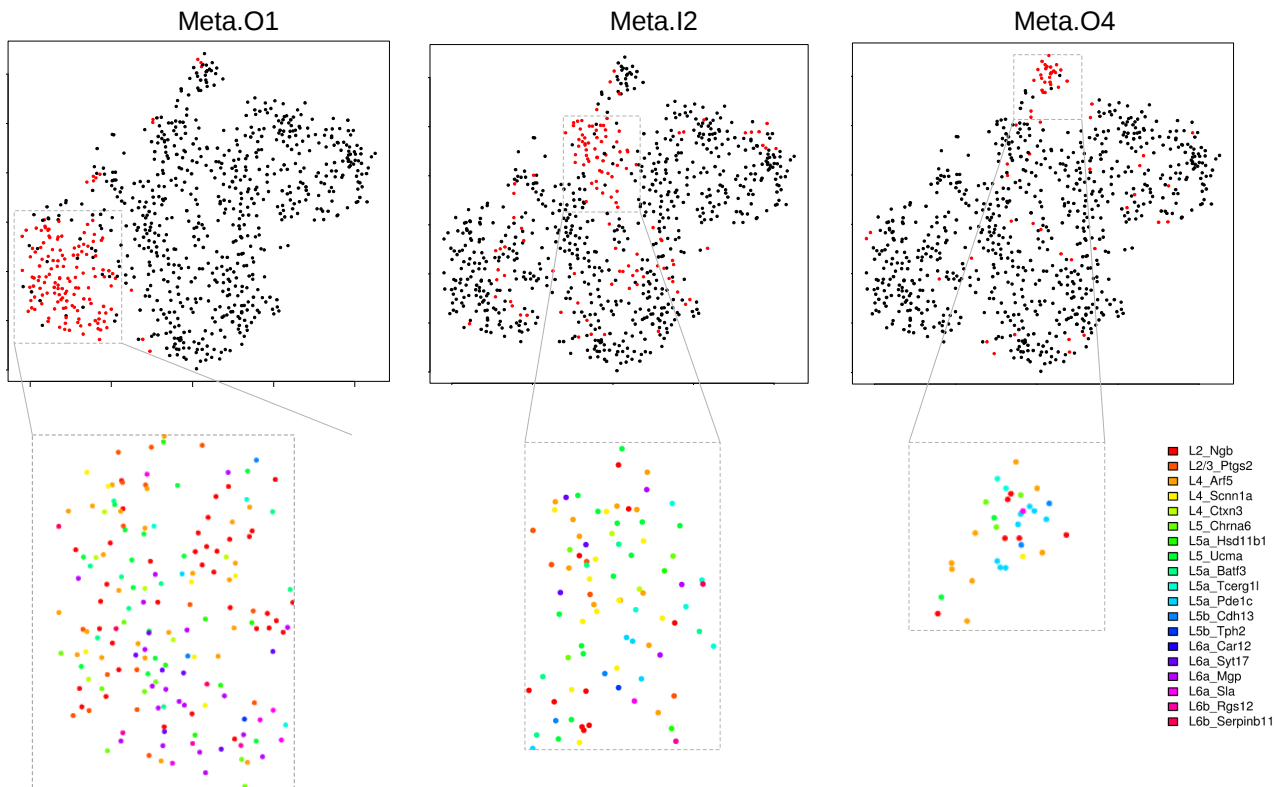



SFig 17

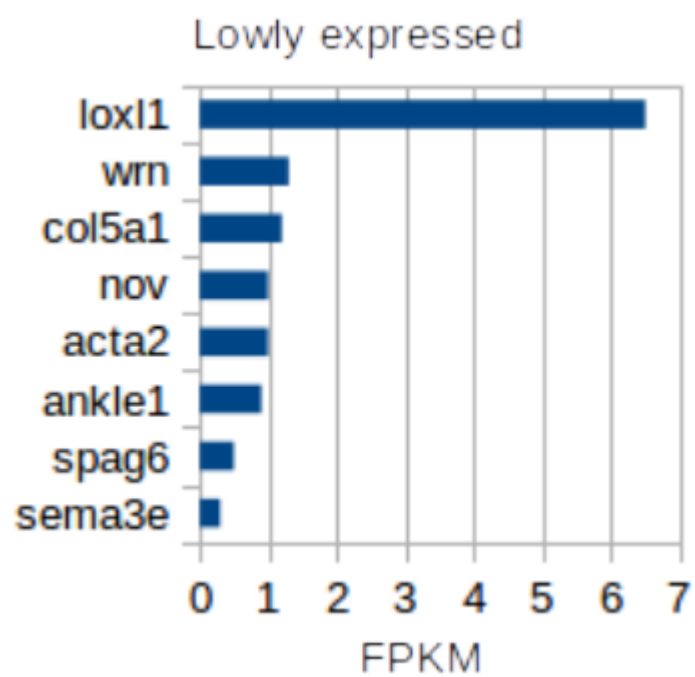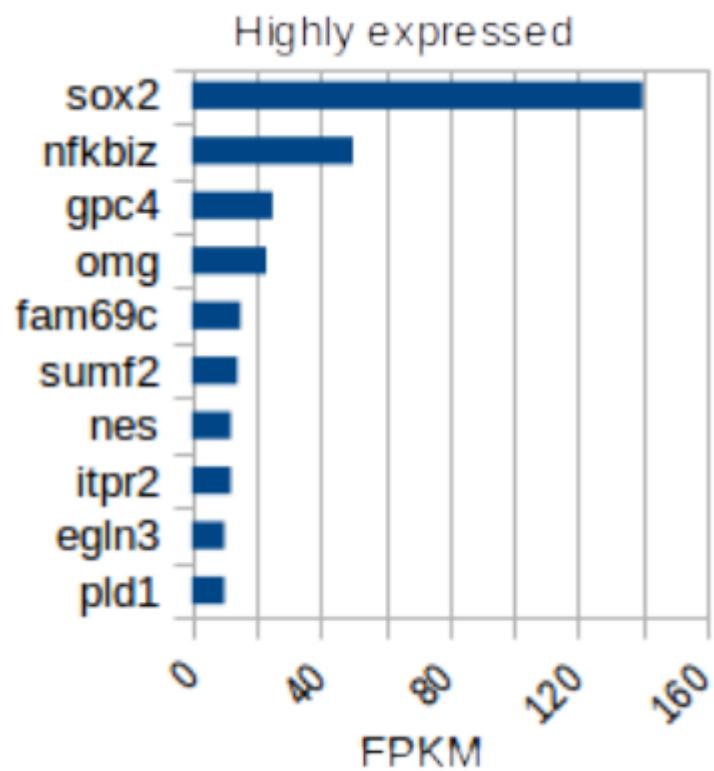

# SFig 18

a

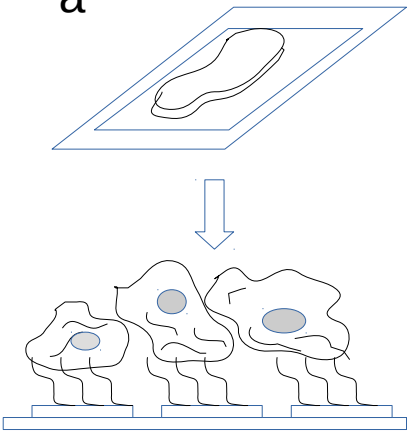

b

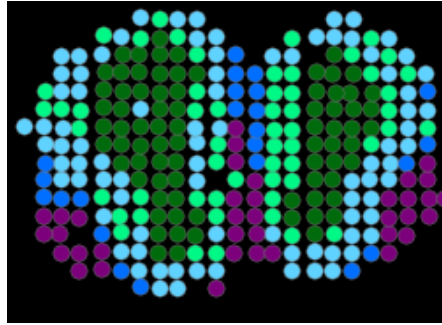

c

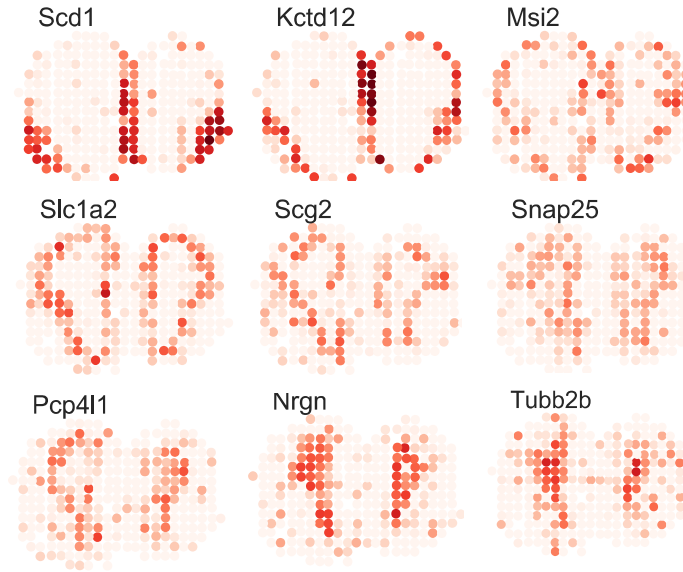

d

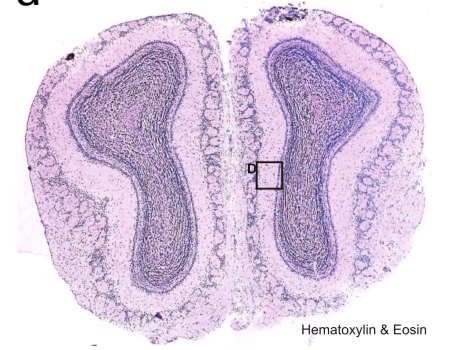

SFig 19

a

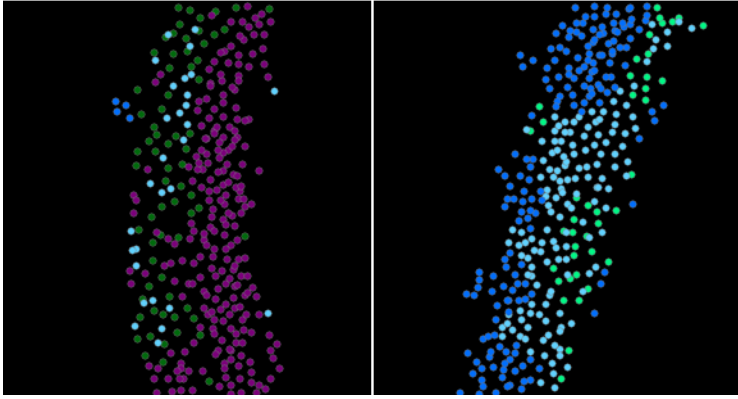

b

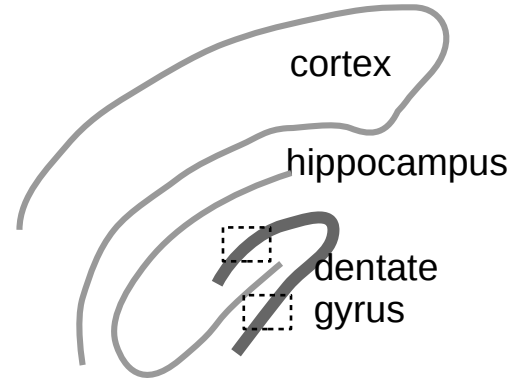

c

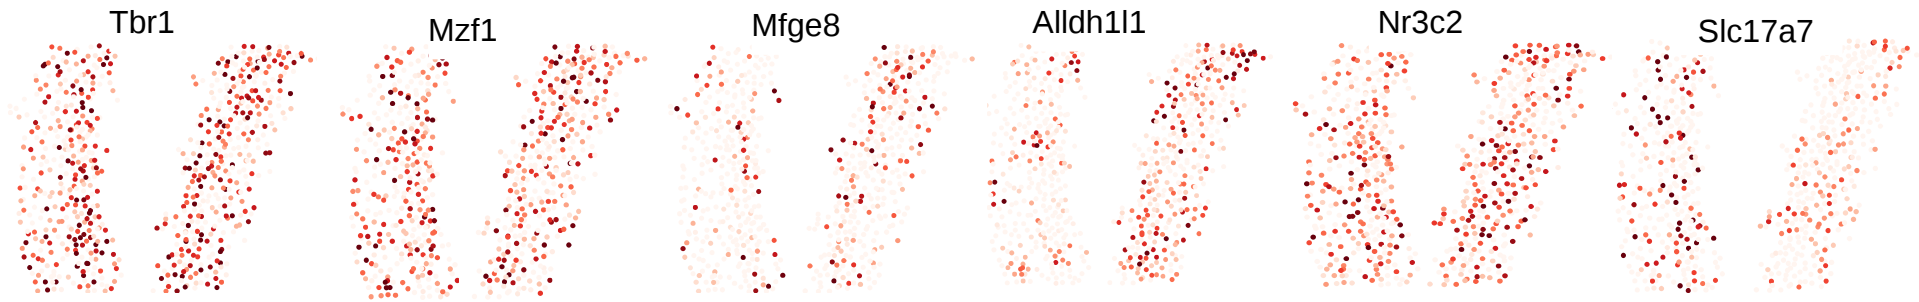

SFig 20

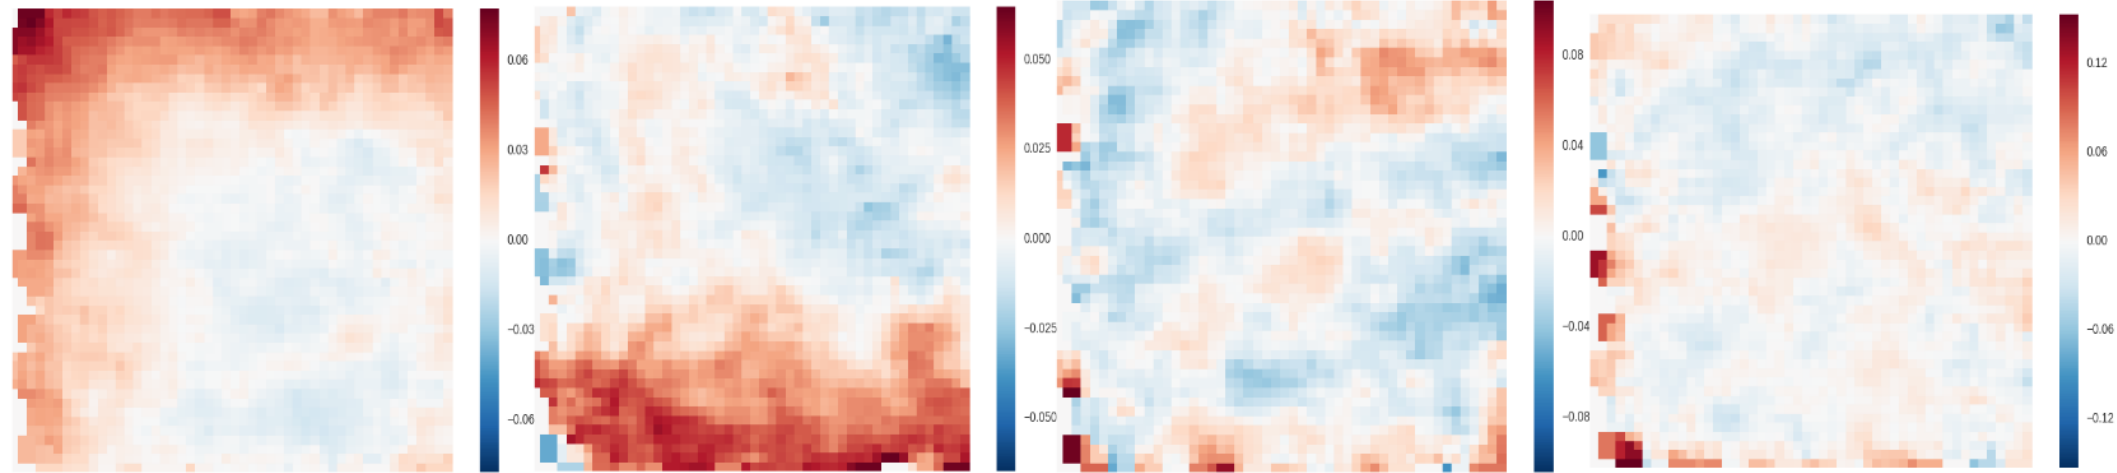

# SFig 21

## a

8 major classes  
22 finer classes  
49 minor classes

|                  |              |              |            |            |            |           |             |            |         |           |           |           |          |           |         |          |           |             |           |             |            |          |         |         |           |               |            |           |          |          |      |          |           |             |      |       |           |             |        |           |          |          |             |             |             |           |             |            |            |
|------------------|--------------|--------------|------------|------------|------------|-----------|-------------|------------|---------|-----------|-----------|-----------|----------|-----------|---------|----------|-----------|-------------|-----------|-------------|------------|----------|---------|---------|-----------|---------------|------------|-----------|----------|----------|------|----------|-----------|-------------|------|-------|-----------|-------------|--------|-----------|----------|----------|-------------|-------------|-------------|-----------|-------------|------------|------------|
| 8 major classes  | Oligo.1      | Oligo.2      | OPC        | Astro      | Micro      | Endo      | Glut-N      |            |         |           |           |           |          |           |         |          |           |             |           |             |            | GABA-N   |         |         |           |               |            |           |          |          |      |          |           |             |      |       |           |             |        |           |          |          |             |             |             |           |             |            |            |
| 22 finer classes | Oligo.1      | Oligo.2      | OPC        | Astro      | Micro      | Endo      | L2/3        | L6a        | L4_Arf5 | L4_Ctxn3/ | Scnn1a    | L5_Ucma / | Chma6    | L5a       | L5b     | L6a      | L6b       | Vip         | Sncg      | Ndnf        | Igtp/Smad3 | Sst      | Pvalb_1 | Pvalb_2 |           |               |            |           |          |          |      |          |           |             |      |       |           |             |        |           |          |          |             |             |             |           |             |            |            |
| 49 minor classes | Oligo_96_Rik | Oligo_Opalin | OPC_Pdgfra | Astro_Gja1 | Micro_Ctss | Endo_Myl9 | Endo_Tbc1d4 | L2/3_Ptgs2 | L2_Ngb  | L6a_Car12 | L6a_Syt17 | L4_Arf5   | L4_Ctxn3 | L4_Scnn1a | L5_Ucma | L5_Chma6 | L5a_Pde1c | L5a_Hsd11b1 | L5a_Batf3 | L5a_Tcerg1l | L5b_Cdh13  | L5b_Tph2 | L6a_Mgp | L6a_Sla | L6b_Rgs12 | L6b_Serpinb11 | Vip_Mybpc1 | Vip_Parm1 | Vip_Chat | Vip_Gpc3 | Sncg | Vip_Sncg | Ndnf_Car4 | Ndnf_Cxci14 | Igtp | Smad3 | Sst_Chodl | Sst_Tacstd2 | Sst_Th | Sst_Cbln4 | Sst_Cdk6 | Sst_Myh8 | Pvalb_Obox3 | Pvalb_Rspo2 | Pvalb_Tacr3 | Pvalb_Wt1 | Pvalb_Cpne5 | Pvalb_Gpx3 | Pvalb_Tpbg |

## b

### 8 major classes

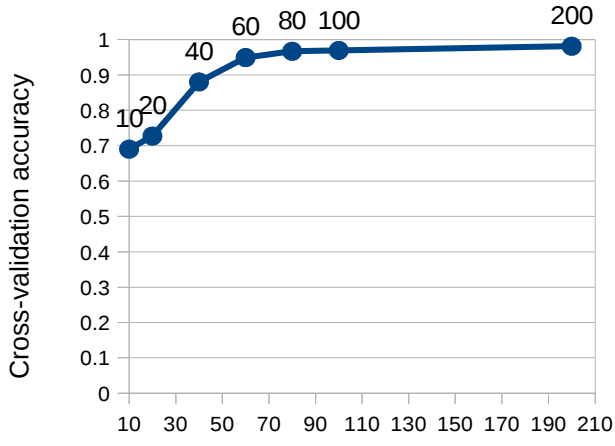

## c

### 22 finer classes

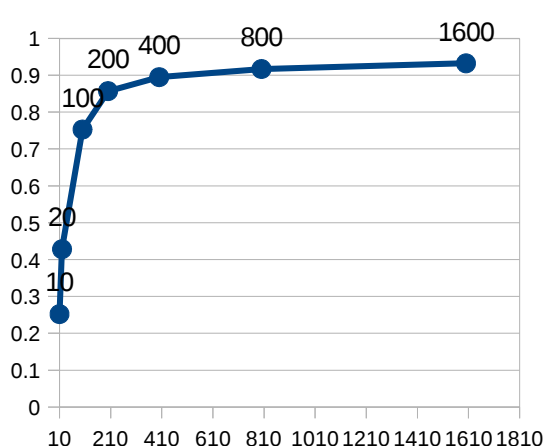

# random DE genes used for multiclass SVM

## d

### 49 minor classes

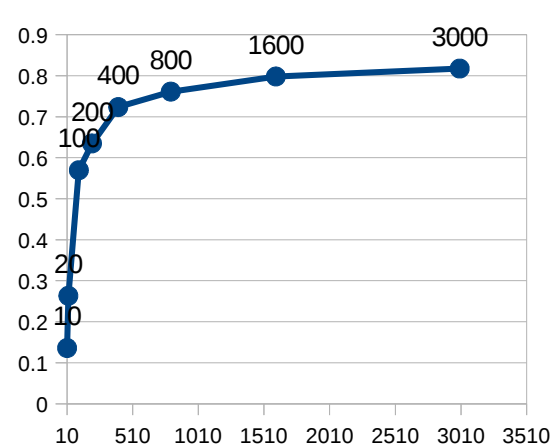

# SFig 22

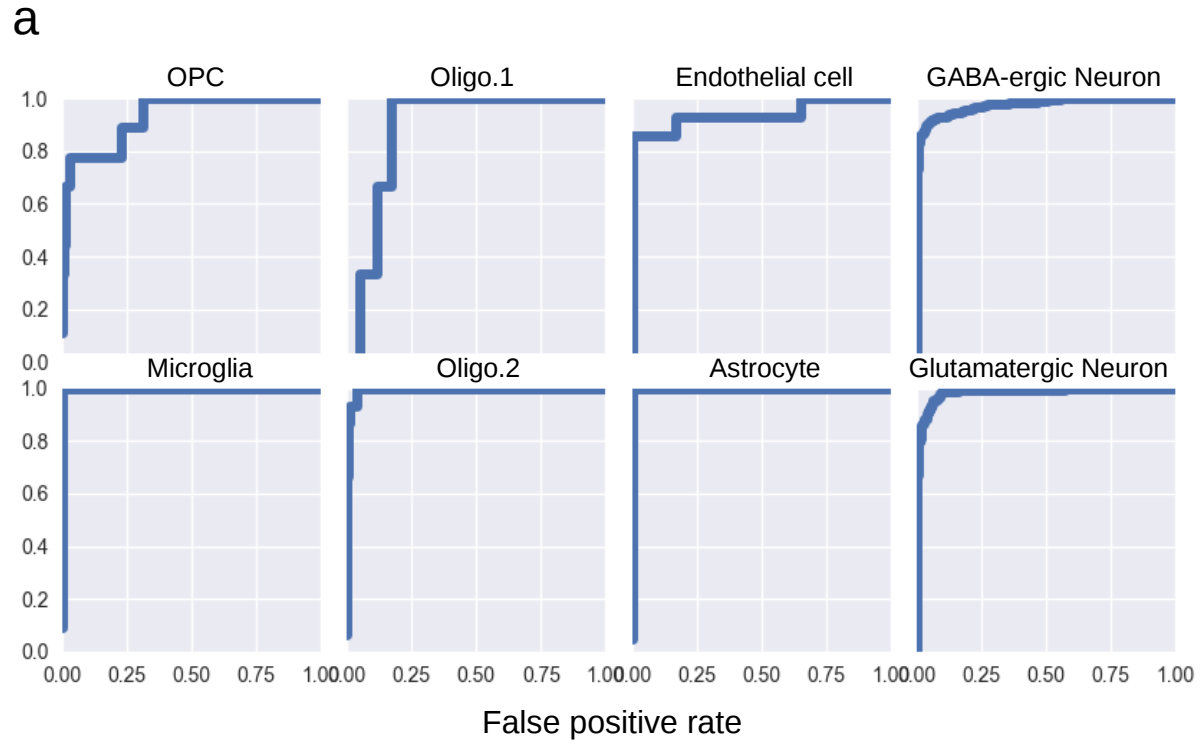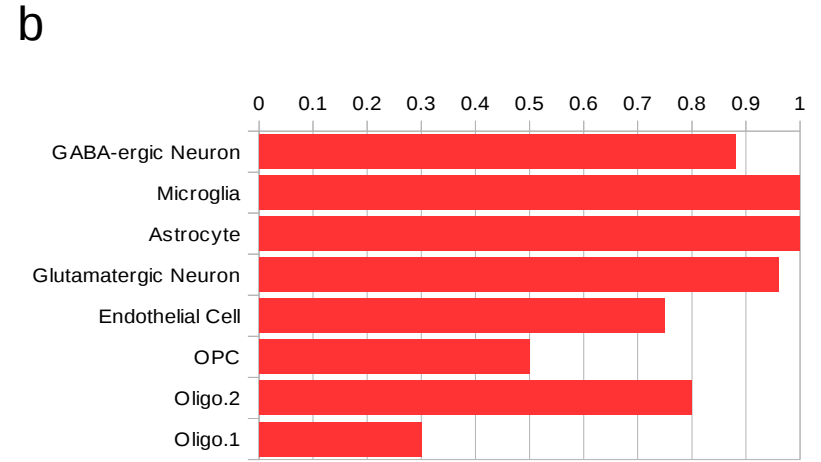

Clustering overlap with respect to 69-gene HMRF

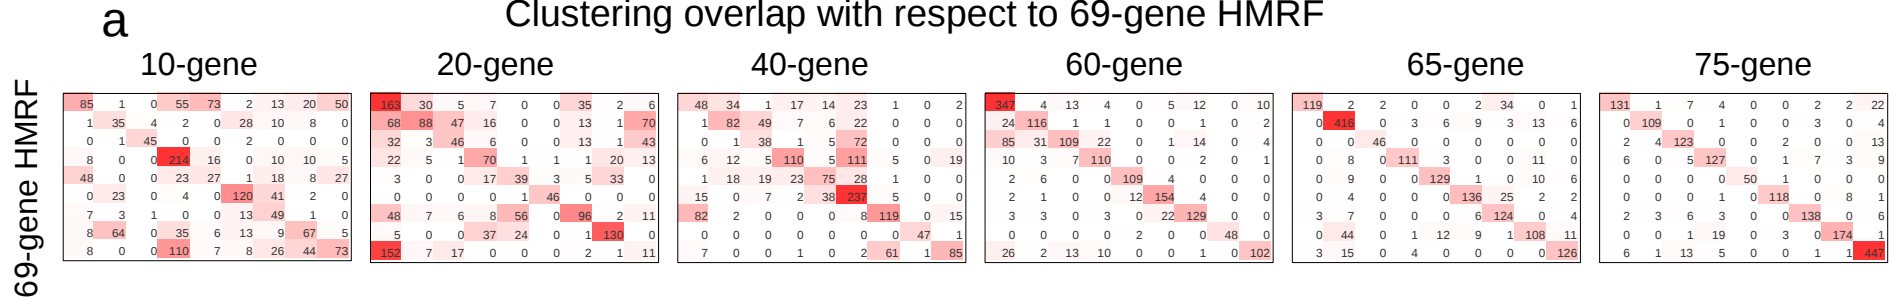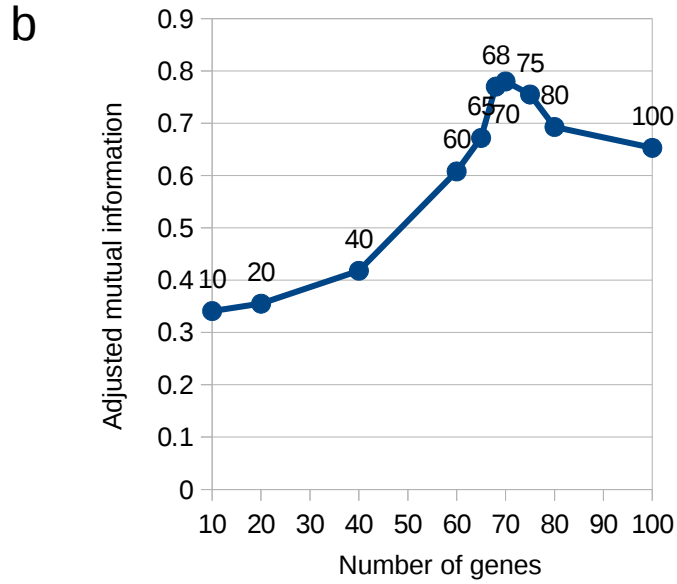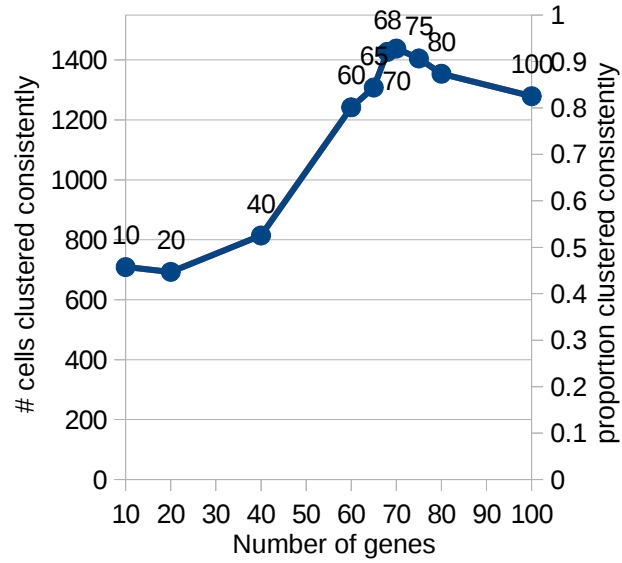

# SFig 24

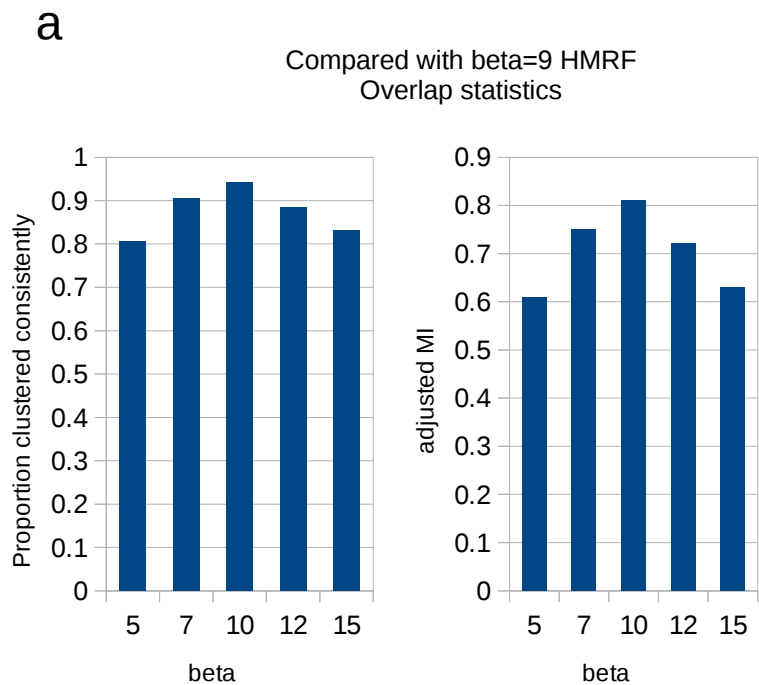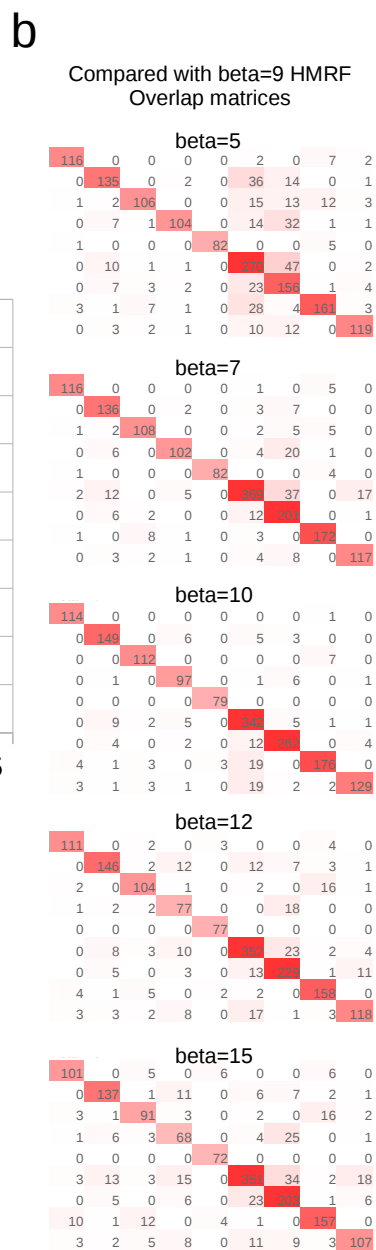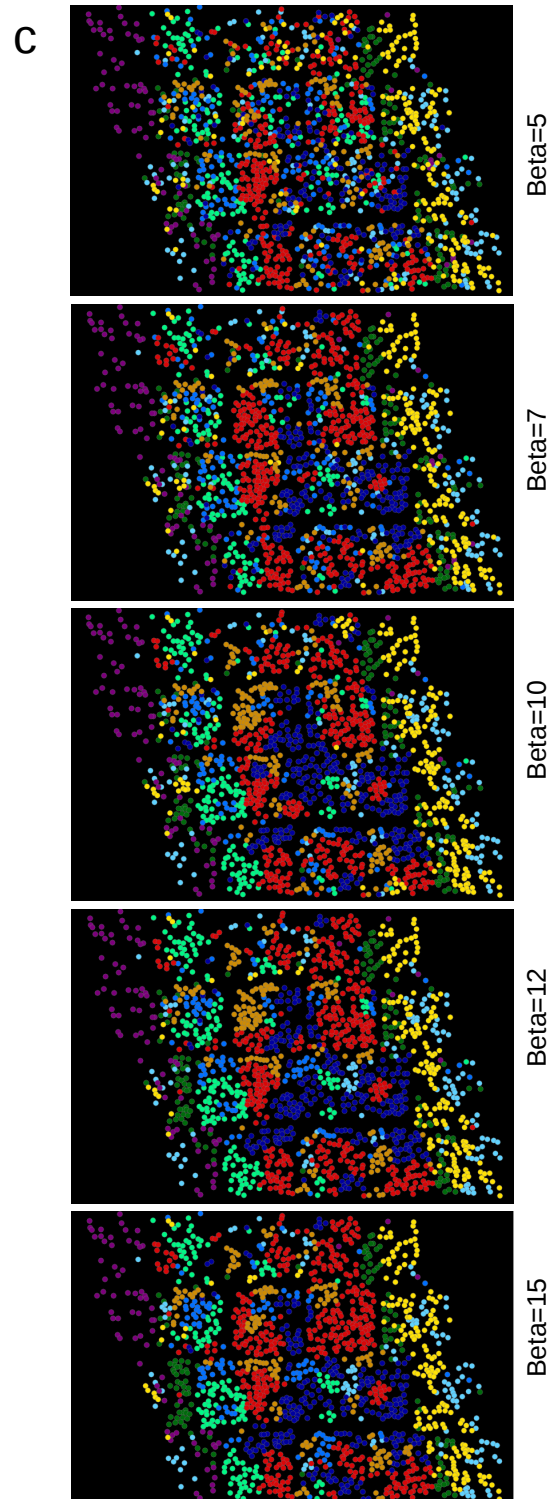



SFig 25

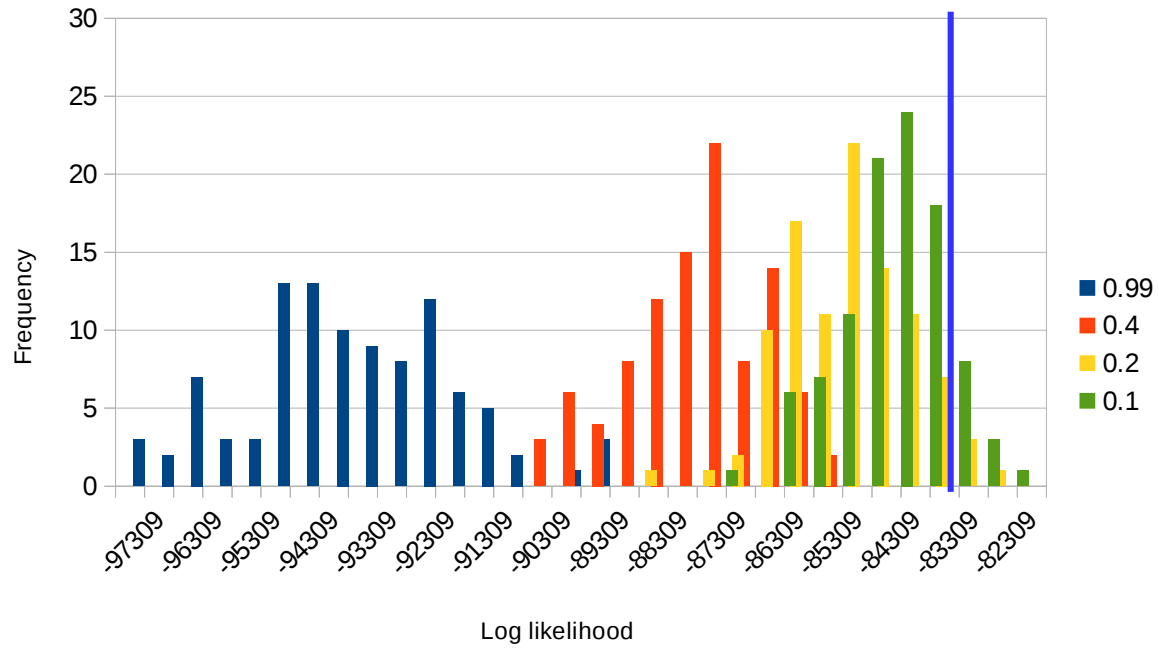

SFig 26

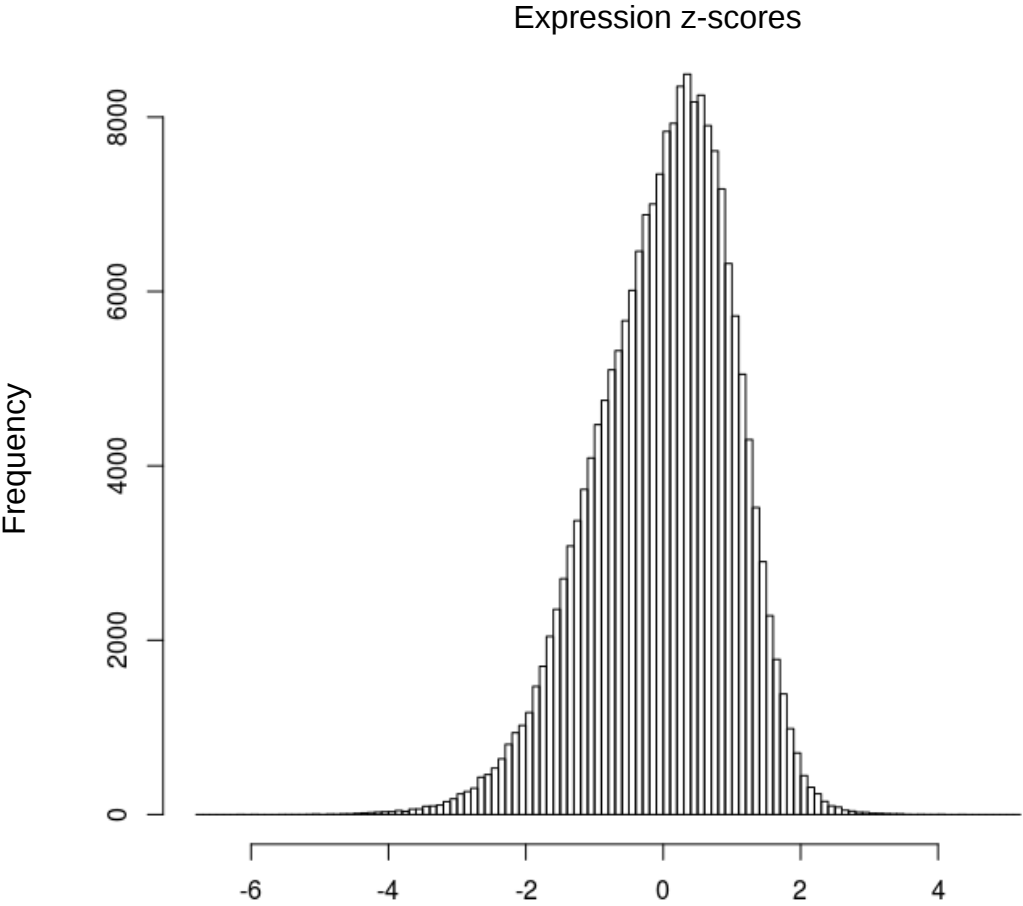

# SFig 27

## Mann Whitney U test

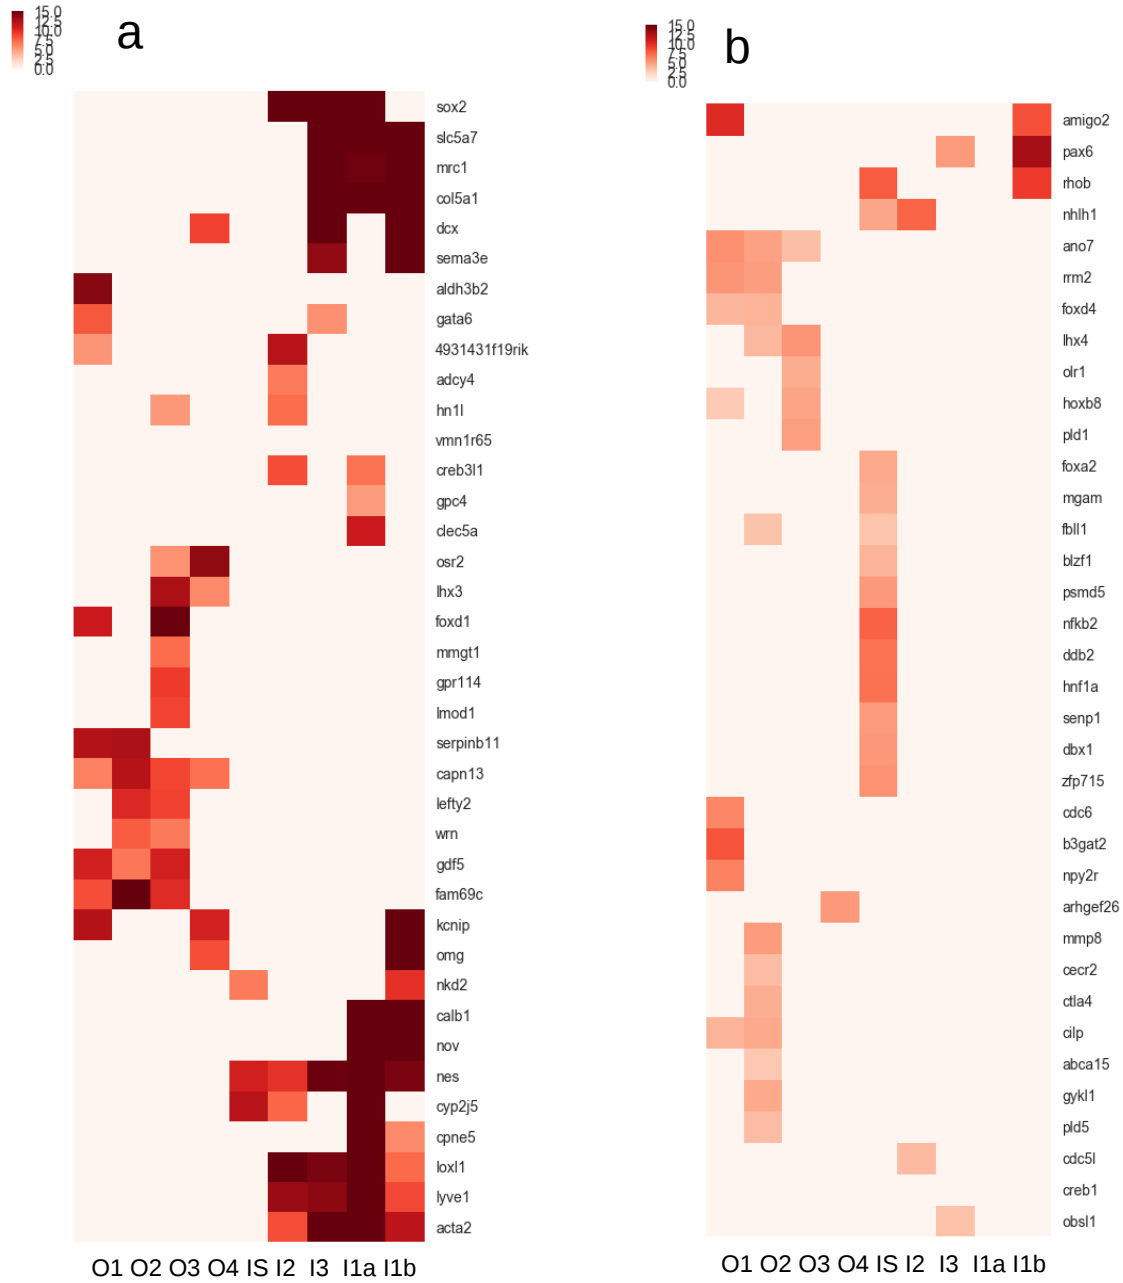

Supplement: Supplementary file [file 275156-1.pdf]
